# Supplementary material
Source: PubMed Central journal article supplement (PMC2535758)
Supplement: NIHMS65651-supplement-Supplemental_M.pdf [file NIHMS65651-supplement-Supplemental_M.pdf]

**Supplemental Materials for Maeder et al., “Rapid “open-source” engineering of customized zinc-finger nucleases for highly efficient gene modification”**

**Supplemental Experimental Procedures**

**B2H selection media**

NM medium has been previously described (Thibodeau-Beganny and Joung, 2007).

NM/CCK medium plates contain 100 µg/mL carbenicillin, 30 µg/mL chloramphenicol, 30 µg/mL kanamycin, and 1.5% Bacto-agar.

**Construction of zinc finger pools**

All master randomized zinc finger libraries were constructed in a standard framework consisting of three tandem repeats of the middle finger of the murine transcription factor Zif268 in which the recognition helix residues have been altered. For each library, recognition helix residues –1, 1, 2, 3, 5, and 6 were randomized using 24 codons (degenerate sequence 5'VNS3') encoding 16 amino acids (excluding cysteine and the aromatics). The theoretical complexity of each library is therefore  $24^6 = \sim 2 \times 10^8$  members. Each library was converted into infectious M13 phage particles as previously described (Joung et al., 2000).

B2H selection strains each harbor: (1) a single copy episome bearing a target site of interest positioned upstream of a promoter which drives co-cistronic expression of two selectable markers (the yeast *HIS3* gene and the bacterial *aadA* gene) and (2) a low copy number plasmid expressing the RNA polymerase  $\alpha$ -subunit/yeast Gal4 hybrid protein ( $\alpha$ -

Gal4). Strains were constructed as previously described (Thibodeau-Beganny and Joung, 2007). The target binding site of each strain was verified by DNA sequencing.

Zinc finger pools were obtained using two selection steps: In a first step,  $10^9$  ampicillin-transducing-units (ATU) of randomized zinc finger phage library were introduced into  $>3 \times 10^9$  B2H selection strain cells harboring a target subsite of interest. Transformed cells were plated on histidine-deficient NM/CCK medium plates containing 50  $\mu$ M isopropyl  $\beta$ -d-thiogalactoside (IPTG) and 10 mM 3-aminotriazole (3-AT), a competitive inhibitor of the HIS3 enzyme. After incubation for 24 hours at 37°C followed by 18 hours at room temperature, surviving colonies were scraped from the plates and infected with M13K07 helper phage to rescue the zinc finger-encoding phagemids as infectious phage. In a second step, this enriched phage library was then used to re-infect fresh B2H selection strain cells and the resulting transformants plated on NM/CCK medium plates containing 50  $\mu$ M IPTG, 10 mM 3-AT, and 20  $\mu$ g/ml streptomycin. After incubation at 37°C for 48 hours, we inoculated 95 surviving colonies of various sizes into individual wells of a 96-well block containing 1ml of Terrific Broth and 50  $\mu$ g/ml carbenicillin. These cultures were grown overnight at 37°C and then a 96-pin replicator was used to inoculate a second block of identical cultures. Glycerol was added to a final concentration of 15% to all wells in the first block and this was stored at -80°C. The second block was grown overnight at 37°C and then the 95 cultures were pooled together. Plasmid DNA encoding the finger pools was isolated from 10 ml of the pooled culture using a QIAGEN miniprep kit and for many pools a small number of random clones were sequenced with primer OK61. For finger pools against nine subsites, sequencing revealed no strong consensus

(i.e.—the sequences were diverse and did not resemble one another), suggesting that selective pressure for those sites was relatively weak under the initial selection conditions. For each of these nine subsites, the second step of selection was repeated and plated on higher stringency plates to obtain sequences that more closely resembled one another. The higher stringency plates used were NM/CCK medium plates containing 50  $\mu$ M IPTG, 20 mM 3-AT, and 30  $\mu$ g/ml streptomycin (for seven subsites: F1 GAT, F2 GAC, F2 GAG, F2 GCG, F2 TGA, F2 TAG, and F2 GTT) or 50  $\mu$ M IPTG, 25 mM 3-AT, and 40  $\mu$ g/ml streptomycin (for two subsites: F2 GAA, F2 TGG).

### **OPEN selections**

To create libraries for use in OPEN selections, finger pools were amplified by PCR. For each amplification, first five and then 20 cycles of PCR were performed using the following primers and annealing temperatures (primer names; initial annealing temp; final annealing temp): for finger 1: OK1424 and OK1425; 55°C; 59°C, for finger 2: OK1426 and OK1427; 52°C; 57°C, for finger 3: OK1428 and OK1429; 41°C; 56°C. Amplified individual finger pools were isolated from 10% polyacrylamide gels and fused together by PCR. To do this, equal concentrations of the three finger pool fragments were fused using the following PCR conditions: 94°C, 5 minutes; 10 cycles of 94°C, 30 sec; 50°C, 30 sec; 72°C, 2 min; final extension 72°C, 7 min. This fusion product was purified using a QIAgen PCR purification kit and then amplified by PCR using primers OK1430 and OK1432 with 10 initial cycles of 94°C, 30 sec; 56°C, 30 sec; 72°C, 1 min and 20 additional cycles of 94°C, 30 sec; 64°C, 30 sec; 72°C, 1 min; final extension 72°C, 7 min. The final PCR product (encoding a library of three-finger arrays) was

isolated on a 5% polyacrylamide gel and treated with *Pfu* polymerase and T4 polynucleotide kinase to create overhangs. This fragment was then ligated with *Bbs*I-digested pBR-UV5-GP-FD2 vector backbone which results in a plasmid that expresses the zinc finger array as a FLAG-tagged Gal11P fusion in the B2H system. This ligation was then introduced into *E. coli* XL-1 Blue cells by electroporation and each library was constructed from  $>3 \times 10^6$  independent transformants, ensuring at least three-fold oversampling of the theoretical library complexity of  $\sim 8.6 \times 10^5$  ( $95^3$ ). Libraries were then converted into infectious M13 phage as previously described (Thibodeau-Beganny and Joung, 2007).

All but six (see below) of the OPEN selections were performed in two stages. In the first stage, an OPEN three-finger library was introduced by infection into a B2H selection strain harboring the full target DNA sequence of interest.  $>2.2 \times 10^6$  ATU of OPEN phage library (a number which ensures adequate oversampling of the maximal theoretical library diversity) were used to infect  $>2 \times 10^8$  B2H selection strain cells and the resulting transformants were plated on two different NM/CCK medium plates containing 50  $\mu$ M IPTG, 10 mM 3AT, and 20  $\mu$ g/mL streptomycin or 50  $\mu$ M IPTG, 25 mM 3AT, and 40  $\mu$ g/mL streptomycin. After 36-48 hours of incubation, colonies were harvested from the highest stringency plate yielding at least 1000 colonies. These cells were infected with M13K07 helper phage to rescue zinc finger-encoding phagemids, thereby creating an enriched library. In the second stage,  $2.5 \times 10^6$  ATU of this enriched library were used to infect  $>2 \times 10^8$  fresh B2H selection strain cells and the resulting transformants plated on a 245x245mm NM/CCK medium plate containing parallel gradients of 3-AT and

streptomycin ranging from 0 mM to 80 mM and 0 µg/mL to 100 µg/mL, respectively. Gradient plates were poured using the method of Szybalski (Bryson and Szybalski, 1952). After incubation at 37°C for a minimum of 48 and a maximum of 96 hours, 12 surviving colonies were picked from the highest stringency edge of the plate and ZFP-encoding plasmids were isolated by plasmid miniprep and sequenced with primer OK61.

For six of the sites we targeted using OPEN, selections were (for historical reasons) performed in a single step instead of two steps. For five sites (EG223L, EG223R, EG292L, EG292R, and EG382L),  $>3.1 \times 10^6$  ATU of OPEN phage library were used to infect  $>4 \times 10^8$  B2H selection strain cells and the resulting transformants were plated on a series of NM/CCK medium plates containing 50 µM IPTG, 40 mM 3AT, and 60 µg/mL streptomycin, 50 µM IPTG, 60 mM 3AT, and 80 µg/mL streptomycin, 0 µM IPTG, 40 mM 3AT, and 60 µg/mL streptomycin or 0 µM IPTG, 60 mM 3AT, and 80 µg/mL streptomycin. For each target site, we picked colonies from the highest stringency plates that yielded colonies. For one site (EG382R),  $4.25 \times 10^8$  ATU of OPEN phage library were used to infect  $>10^9$  B2H selection strain cells and the resulting transformants were plated on a 245x245mm NM/CCK medium plate containing parallel gradients of 3-AT and streptomycin ranging from 0 mM to 80 mM and 0 µg/mL to 100 µg/mL, respectively. Colonies were picked from the highest stringency edge of the plate.

### **Construction of modularly assembled zinc finger arrays**

Modularly assembled zinc finger arrays were assembled using the Zinc Finger Consortium Modular Assembly Kit v1.0 as previously described (Wright et al., 2006).

For each target half-site in the *EGFP* reporter gene, we assembled three-finger arrays using modules from the Barbas, Sangamo, and Toolgen archives but we did not mix and match modules across platforms because: (1) the Barbas group does not suggest use of their modules with others (Mandell and Barbas, 2006), (2) the Toolgen group discovered that their human zinc fingers worked best with one another but not as well with other engineered modules (Bae et al., 2003), and (3) the Sangamo modules were designed to be finger-position-specific and have non-canonical linkers joining them that differ from the TGEKP linker used by the Barbas and Toolgen modules (Liu et al., 2002).

### **Quantitative bacterial two-hybrid (B2H) assays**

Zinc-finger-encoding plasmids identified from OPEN selections were co-transformed with an  $\alpha$ -Gal4 expression plasmid into a “B2H reporter strain” harboring a single copy bacterial plasmid with a target binding site positioned upstream of a weak promoter driving *lacZ* expression. B2H reporter strains were constructed as described (Wright et al., 2006).  $\beta$ -galactosidase assays were performed in triplicate as described (Thibodeau et al., 2004).

### **ZFN expression vectors**

All zinc finger arrays were expressed as ZFNs using the Zinc Finger Consortium mammalian expression vector pST1374 (Wright et al., 2006). Zinc finger arrays were excised directly from B2H expression vectors on an *XbaI/BamHI* fragment and cloned into pST1374. In this configuration, zinc finger arrays are joined to the *FokI* nuclease domain by a four amino acid linker of sequence LRGS. We constructed expression

vectors encoding the four-finger *IL2R $\gamma$*  ZFNs using amino acid sequences obtained from a previously published study (Miller et al., 2007).

### **Human cell-based EGFP-disruption assay**

Human 293.EGFP cells harbor an integrated retroviral construct which constitutively expresses a  $\beta$ -galactosidase-EGFP fusion protein (Figure 2B). 293.EGFP cells were transfected in triplicate in 24-well plates using calcium phosphate precipitation as previously described (Cathomen et al., 2001). Transfection cocktails included 300 ng each of a CMV promoter-controlled zinc finger nuclease expression vector, 100 ng pDS.RedExpress (Clontech, Mountain view, CA) and pUC118 to 1.5  $\mu$ g. 600 ng of pRK5.SceI plasmid (Alwin et al., 2005), which expresses the meganuclease I-SceI, was used in place of GFP-ZFN-encoding plasmids for negative controls. 50,000 cells were analyzed by flow cytometry two and five days post-transfection to determine the percentage of EGFP-negative cells. The number of REx-positive cells at day 2 was used to normalize for transfection efficiency. Statistical significance was determined using a two-sided student's t-test with unequal variance.

### **CEL I nuclease assay for NHEJ-mediated mutation**

In this assay, limited-cycle PCR is used to amplify a locus of interest from the genomic DNA of a population of human cells transfected with ZFN expression vectors (Figure 3A). The resulting PCR product is denatured and re-annealed and heteroduplex DNA will form if mutated alleles are present in the population. These DNA fragments can be cleaved at the site of mismatch by the CEL I enzyme into smaller products of predictable

size. Specifically,  $2 \times 10^6$  human Flp-In T-REx 293 cells (Invitrogen) were transfected with pairs of ZFN-encoding plasmids (100 or 250 ng of each ZFN-encoding plasmid) using Lipofectamine 2000 (Invitrogen). Genomic DNA was isolated from nuclease-treated cells at 3 days post-transfection using the QIAgen Blood Mini kit. Limited-cycle PCR (24 cycles) was performed using Platinum PCR SuperMix Hi-Fidelity (Invitrogen) or its equivalent constituent components (Invitrogen) with 50 ng of genomic DNA as template, 8  $\mu$ Ci of each [ $\alpha$ - $^{32}$ P]-dATP and dCTP, 1  $\mu$ M each of gene-specific primers (primers OK1681 and OK1682 for *VEGF-A* sites VF2468/VF2471, primers OK1706 and OK1718 for *VEGF-A* sites VF3537/VF3542/VF3552, primers OK1733 and OK1734 for *HoxB13* sites HX508/HX587 or primers OK1736 and OK1738 for *HoxB13* sites HX735/HX761) and 1.25  $\mu$ l DMSO in a 25  $\mu$ l reaction volume. PCR products were cleaned up using Sephadex G-50 columns (Roche) and then melted/re-annealed using the following conditions: 95°C for 10 min; 95°C to 85°C cooling at a rate of -2°C/sec; 85°C to 25°C cooling at a rate of -0.1°C/sec; rapid cool to 4°C. Re-annealed PCR products were diluted 1:3.75 in a buffer of 20 mM Tris-HCl (pH 8.8), 2 mM MgSO<sub>4</sub>, 60 mM KCl, 0.1% Triton X-100 and treated with 1  $\mu$ l CEL I enzyme (Surveyor nuclease S; Transgenomic) and 1  $\mu$ l Surveyor Enhancer S (Transgenomic) in a 15  $\mu$ l reaction incubated at 42°C for 20 min. Products were visualized by electrophoresis on a 0.8mm thick, 10% 1X TBE polyacrylamide gel which was dried down and exposed overnight to a phosphorimaging screen. All experiments were performed a minimum of two times.



### **Gene targeting assays**

2 x 10<sup>6</sup> Flp-In T-REx 293 cells were transfected with pairs of plasmids expressing ZFNs (7.5 µg of each ZFN-encoding plasmid) and 50 µg of donor plasmid using nucleofection with solution V and program Q001 (Amaxa). 2 x 10<sup>6</sup> K562 cells were transfected with ZFN expression plasmid pairs (5 or 7.5 µg of each) and matched donor construct (25 or 50 µg donor plasmid) using nucleofection with solution V and program T-16. Genomic DNA was harvested 3 or 4 days post-transfection for 293 or K562 cells, respectively, using a QIAGEN Blood Mini kit. Transfection efficiencies were monitored by including a GFP-encoding plasmid in each transfection and determining the percentage of GFP-positive cells by flow cytometry one day post-transfection. For experiments in which cells were arrested in G2 phase, 0.2 µM vinblastine was added 24 hours post-transfection and then removed by washing three times with phosphate buffered saline 14-18 hours later. Limited-cycle PCR assays (24 cycles) were performed using Platinum PCR SuperMix Hi-Fidelity (Invitrogen) or its equivalent constituent components (Invitrogen) with 4 ng genomic DNA, 8 µCi of each [alpha-<sup>32</sup>P]-dATP and dCTP, 1 µM each of gene-specific primers (OK1776 and OK1777 for *VEGF-A* or OK1845 and OK1846 for *IL2Rγ*) and 1.25 µl DMSO in a 25 µl reaction. Purified PCR product was digested with 25 units *Sa*I or 10 units *Bsr*BI restriction enzyme for 2 hours and the resulting products were visualized by electrophoresis on a 10% 1X TBE polyacrylamide gel. This gel was dried down and exposed overnight to a phosphorimaging screen. Quantification of bands was performed using Quantity One software (Bio-Rad).

For Southern blots, 15 µg of genomic DNA (15 µg) was digested with *MscI* and *SaII* restriction enzymes for 20 hrs, electrophoresed in 0.8% tris-acetate agarose gels (100 mM Tris-HCl, 10 mM EDTA, pH 8.0 with acetic acid), and transferred to Zeta-probe nylon membrane (BioRad) using 25 mM sodium phosphate (pH 6.5) according to the procedure of Southern (Southern, 1975) as modified for use with the Turbo-Blot downward transfer apparatus (Schleicher & Schuell). The *VEGF-A* DNA probe was generated by PCR amplification of a cloned human *VEGF-A* DNA template using primers OK1823 and OK1824 which was subsequently labeled (25 ng) with [ $\alpha$ - $^{32}$ P]-dCTP) using Rediprime II random priming reagents (Amersham). Following hybridization (20 hrs) at 65°C in 5 mL ExpressHyb solution (Clontech), the filters were washed with 0.1X SSC/0.1% SDS at 65°C (2 hrs), blotted dry and exposed to a phosphorimager screen and/or film. The filters were scanned in the Typhoon 8600 phosphoimager and relative band intensities were quantified by volume analysis using ImageQuant software (GE Healthcare/Amersham).

### **Sequencing of modified genomic alleles**

The region encompassing each potential ZFN cleavage site was amplified from genomic DNA isolated from populations of human Flp-In T-REx 293 or K562 cells that had been transfected with ZFN expression plasmids alone or with ZFN expression and donor plasmids. PCR conditions for these amplifications were the same as those used for the CEL I (for assessing NHEJ events) or limited-cycle PCR/restriction digest (for assessing gene targeting events) assays but with all components doubled to a final volume of 50µl. CF877 was amplified using primers OK1711 and 1713. PCR reactions were purified

using the QIAgen Minelute PCR Purification kit and eluted with 15  $\mu$ l 0.1X EB buffer (QIAgen). PCR fragments were cloned into the pCR4Blunt-TOPO plasmid using the Zero Blunt TOPO PCR Cloning Kit for Sequencing (Invitrogen). The TOPO cloning reaction used 4  $\mu$ l purified PCR product, 1  $\mu$ l salt solution and 1  $\mu$ l TOPO vector. 2  $\mu$ l of TOPO reaction were transformed into One Shot Mach1-T1 chemically competent cells (Invitrogen) or chemically competent Top10 cells (Invitrogen) and plated on LB plates containing 50  $\mu$ g/ml kanamycin. Plasmid DNAs from transformants were sequenced with a primer designed to bind internal to the PCR product (OK1773 or T3 (Invitrogen) for *VEGF-A*, OS216 for *HoxB13*, M13 primer (Invitrogen) for *CFTR* or OK1838 for *IL2R $\gamma$* ).

### **Tobacco transformation and assay for mutations**

The transformation of tobacco protoplasts by electroporation was carried out as previously described (Wright et al., 2005). Plasmids introduced into protoplasts (10  $\mu$ g each) included those expressing ZFNs that recognize the left (pRW242) and right (pRW246) half sites of target 2163 in *SuRA*. Note that these constructs do not express the heterodimeric variants of *FokI* endonuclease. Also transformed into protoplasts was a plasmid expressing neomycin phosphotransferase (NPTII) (pDW998). The CaMV 35S promoter was used to drive expression of both the ZFNs and NPTII. Plasmid DNAs were linearized with *BglIII* prior to transformation. Protoplasts were allowed to recover and then selected for kanamycin resistance and regenerated into plantlets as previously described (Wright et al., 2005).

DNA was prepared from tissue harvested from individual plantlets using the Epicentre MasterPure Plant Leaf DNA Purification Kit following the manufacturer's directions. An initial PCR screen for mutations at the site of ZFN cleavage was performed using primers DVO4461 and DVO4462 to amplify a 445 bp fragment from both the *SuRA* and *SuRB* loci. PCR was performed with 100 ng of genomic DNA and the following PCR conditions: 94°C 2 min, followed by 34 cycles of 94°C 15 sec, 61°C 15 sec, 72°C 30 sec, and then 72°C for 5 min. The reactions were run out on a 0.8% agarose gel, purified using a QIAGEN QIAquick Gel Extraction kit, and sequenced with DVO4462. The resulting sequences were examined for double peaks, which not only indicate sequence differences between *SuRA* and *SuRB*, but also identify potential insertion/deletion events at the ZFN cleavage site in either or both loci.

DNA from candidate mutants was then PCR amplified using a set of nested, allele-specific primers in two consecutive PCR reactions to confirm the mutation and determine if it occurred in *SuRA* or *SuRB*. The primary reaction amplified a 2.15 kb fragment using approximately 100 ng of genomic DNA as template and primers DVO4565 and DVO4461 for *SuRA* and DVO4429 and DVO4461 for *SuRB*. The second PCR reaction amplified a 2 kb fragment using 1 µl of the primary PCR reaction as template and primers DVO4444 and DVO4461 for *SuRA* and DVO4445 and DVO4461 for *SuRB*. All PCR reactions were performed using a Clontech Advantage cDNA Polymerase kit and the following PCR conditions: 94°C 1 min, followed by 34 cycles of 94°C 30 sec, 66°C 30 sec, 68°C 3 min, and then 68°C for 5 min. The reactions were run out on a 0.8% agarose gel, purified with a QIAGEN QIAquick Gel Extraction kit and sequenced with primer DVO4462.

## ZFN toxicity assays

ZFN expression plasmids and donor templates were transfected into K562 cells using nucleofection as described above. For these experiments, 5 µg of each ZFN expression plasmid, 25 µg of donor, and 15 ng of pmaxGFP (encoding a GFP variant; Amaxa) were included in each transfection. For controls, we transfected: (1) 10 µg of plasmid encoding I-*SceI* meganuclease (Porteus and Baltimore, 2003) with 25 µg pUC118 and 15 ng of pmaxGFP, (2) 10 µg of plasmid encoding CAD (caspase-activated DNase) protein (Pruett-Miller et al., 2008) with 25 µg pUC118 and 15 ng of pmaxGFP, or (3) 35 µg of pUC118 and 15 ng of pmaxGFP. Cells were assayed for GFP expression at post-transfection days 1 and 7 with a FACScan cytometer. GFP ratios shown in Figure 4D (green bars) were calculated using the formula:

$$\frac{(\%GFP+ \text{ in ZFN-transfected cells on day 7} / \%GFP+ \text{ in ZFN-transfected cells on day 1})}{(\%GFP+ \text{ in pUC-transfected cells on day 7} / \%GFP+ \text{ in pUC-transfected cells on day 1})}$$

In addition, genomic DNA was harvested using a QIAgen Blood Mini Prep kit on post-transfection days 4 and 7 and assayed for gene targeting using the limited-cycle PCR/restriction digest assay as described above. Gene targeting ratios shown in Figure 4D (purple bars) were calculated by dividing the gene targeting rate on day 7 by the gene targeting rate on day 4. All assays (both GFP and gene targeting) were performed on at least three-independent samples and t-tests of significance were performed by comparing experimentally determined ratios to a fixed ratio value of 1 (i.e.--no change in value). Variant heterodimer *FokI* domains were constructed by introducing the “+” and “-“ mutations (previously described in Miller et al., 2007) into the wild-type *FokI* nuclease

domain.

### **Fluorescence in situ hybridization (FISH)**

Two-color fluorescence in situ hybridization (FISH) was performed on 3:1 methanol-acetic acid fixed cell lines using bacterial artificial chromosome clones RP11-710L16 (6p21.1; VEGFA) labeled in Spectrum Orange (Abbott-Vysis, Downer's Grove, IL), or RP11-142P4 (14q31.1; copy number control) labeled in Spectrum Green using standard protocols. Images were captured using an Olympus BX61 fluorescent microscope equipped with a CCD camera, and analysis was performed with Cytovision software (Applied Imaging, San Jose, CA).

## **Supplemental Figure and Table Legends:**

### **Figure S1 ZiFiT 3.0 -- Web-based software for identifying potential sites targetable by OPEN selection**

(A) Screen shot of ZiFiT 3.0 input page. We previously described ZiFiT, a web-based software program that enables users to rapidly identify potential zinc finger nuclease target sites within genes of interest (Sander et al., 2007; Wright et al., 2006). The original implementations of ZiFiT (versions 1.0 and 2.0) were both geared toward making zinc finger nucleases by modular assembly, and the output cross-referenced zinc finger modules available in the Zinc Finger Consortium Modular Assembly Kit 1.0 (Wright et al., 2006). With the implementation of OPEN, we have released ZiFiT Version 3.0, which gives users the option of searching for target sites for which OPEN pools are available. The user pastes a DNA sequence (limited to 10,000 characters) into the text box at the top of the main window. Underneath the main window are three boxes corresponding to finger positions in the zinc finger array. Each box contains a list of the 64 possible nucleotide triplets. By default, triplets are checked for which OPEN pools are currently available from the Zinc Finger Consortium; however, users can manually select or deselect triplet pools to customize their search. Target site composition can be further restricted by options available under the "Advanced/Basic" toggle near the bottom of the screen. By selecting the "Submit" button, the sequence is searched for all target sites using the specified pools and an output is returned.

(B) Screen shot of ZiFiT 3.0 output page. In addition to identifying zinc finger nuclease target sites in the input sequence, it may be desirable to identify matching or highly

similar sites within a genome of interest. ZiFiT Version 3.0 enables the user to BLAST the genome sequence of a desired organism to identify duplicate or related target sites. The BLAST search is implemented by a button link and an organism selection menu provided for each target site returned in the output on the results page. Requests are submitted to the NCBI BLAST servers to provide maximum reliability and speed, and results are typically returned to ZiFiT within a minute. Note that BLAST scoring methods do not identify all matches near the end of a hit if they are separated by mismatches that lower the score of the local alignment. As a result, hits to highly similar target sites lacking information at the ends may need to be analyzed manually.

**Figure S2 Schematic of target sites in the *EGFP*, *VEGF-A*, *HoxB13*, and *CFTR* genes**

Using ZFNs made by OPEN selections, we targeted (A) five full ZFN sites in the *EGFP* reporter gene (EG223, EG292, EG382, EG502, and EG568), (B) six sites in open chromatin regions of the human *VEGF-A* gene (VF2468, VF2471, VF3537, VF3540, VF3542, and VF3552), (C) five sites in the first coding exon of the human *HoxB13* gene (HX500, HX508, HX587, HX735, and HX761) and one site in the last coding exon of the human *HoxB13* gene (HX2119, not shown), and (D) one site in exon 10 of the human *CFTR* gene (CF877) positioned within 100 base pairs of the  $\Delta$ F508 deletion.



**Figure S3 DNA sequence analysis of endogenous human and plant genes  
mutagenized by OPEN ZFNs**

(A-C) Sequences of (A) *HoxB13* alleles from human 293 cells transfected with HX587 ZFN pair B, (B) *CFTR* alleles from human K562 cells transfected with CF877 ZFNs, and (C) Sequences of *SuRA* alleles from tobacco plants transfected with SR2163 ZFNs (matching sequence from the *SuRB* gene is also shown). Numbers of each allele identified are shown in parentheses. ZFN recognition sites are in bold orange print.

**Figure S4 Schematics of donor templates and primers used for gene targeting  
experiments at the human *VEGF-A* and *IL2R $\gamma$*  genes.**

Donor templates were constructed for OPEN ZFN pairs that cleave at the VF2468 and VF2471 sites and for a previously described four-finger ZFN pair that cleaves in the *IL2R $\gamma$*  gene (Urnov et al., 2005). Each donor template consists of 1.5 kb of genomic DNA sequence centered on the cleavage site and introduces either an 11 bp insertion encoding a *SalI* restriction site at the center of the cleavage site (for *VEGF-A* targets) or a translationally silent point mutation which creates a *BsrBI* restriction site adjacent to the ZFN cleavage site (for *IL2R $\gamma$* ) (Urnov et al., 2005). Arrows indicate primers used for limited-cycle PCR/restriction digest assay described in the text.

**Figure S5 Comparison of PCR-based and Southern blot methods for assaying gene targeting efficiencies.**

Limited-cycle PCR and Southern blot were used to assess gene targeting efficiencies in cells treated with different ZFNs under various conditions. Dotted red line represents where data points would fall if the two methods were perfectly concordant.

**Figure S6 DNA sequence analysis of endogenous human alleles that have undergone gene targeting induced by ZFNs**

(A-C) Sequences of alleles sequenced from human K562 cells transfected with (A) VF2468 ZFNs and donor, (B) VF2471 ZFNs and donor, and (C) *IL2R $\gamma$*  ZFNs and donor. Data are presented as in Figure S3.

**Figure S7 OPEN ZFNs induce stable multi-allelic alterations of at an endogenous human gene**

FISH analysis indicated that K562 cells harbor four alleles of the *VEGF-A* gene (A, upper left panel) and we therefore wished to determine how many of these alleles could be altered in a single cell. Limiting dilution cloning was used to isolate single cell clones from two vinblastine-treated K562 cell populations which had undergone high frequencies of gene targeting: 45% and 26% with the VF2468 and VF2471 ZFN pairs, respectively (B, upper panel). (The VF2468 ZFN-treated cells also showed evidence of a 625 bp deletion (blue asterisks), a finding confirmed by sequencing of alleles from these cells (data not shown).) Individual clones from VF2468 ZFN-treated cells harbored no, one, three, or four alleles that had undergone a gene targeting event with some of the

clones also containing the 625 bp deletion (B, lower left panel). Genotype analysis of individual cell clones from the VF2471 ZFN-treated cells revealed clones in which no, one, two, or three *VEGF* alleles had undergone a gene targeting event (B, lower right panel). All individual cell clones were genotyped more than thirty-five days post-transfection, demonstrating that gene targeting events we observed are stably maintained. FISH analysis of three cell clones in which all four *VEGF-A* alleles had undergone the VF2468 ZFN-induced gene targeting event confirmed the continued presence of four copies of *VEGF-A* per cell (A, upper right, and lower left and right panels). FISH was performed with a probe for *VEGF-A* (red) and a control probe for 14q which is present in two copies per cell (green). Taken together, these results demonstrate that OPEN ZFNs can be used to induce permanent alterations in as many as four alleles in a single human cell.

**Table S1: Sequences and B2H assays of zinc finger arrays selected by OPEN**

The subset of zinc finger arrays we converted to ZFNs for testing in human or plant cells are highlighted in green. As noted in the text, a small number of selections were performed in a single step on plates with fixed concentrations of IPTG, 3-AT, and streptomycin. For these selections, IPTG concentration shown is in  $\mu\text{M}$ , 3-AT concentration shown is in mM, and streptomycin concentration shown is in  $\mu\text{g/ml}$ . Fold-activation of transcription in the B2H system was determined by comparing *lacZ* expression from B2H reporter strains harboring a zinc finger array (fused to a fragment of the yeast Gal11P protein) to matched strains harboring a control that does not express a zinc finger array. All determinations were performed in triplicate and the means and

standard deviations of these means are shown. Certain target sites cause a higher basal level of *lacZ* expression in the quantitative B2H assay and the finger arrays tested on these sites may exhibit lower apparent fold-activations due to this effect (affected values are highlighted in yellow). Certain zinc finger arrays (marked by a “+” in the last column) harbor additional mutations outside of the three randomized recognition helices that were most likely introduced during library construction. The identities of these various mutations are available upon request.

Although half-site EG502L did not yield OPEN zinc-finger arrays which activated by more than three-fold, we note that the basal level of transcription from the B2H reporter bearing this site was high, a situation which can artifactually lower the apparent fold-activation observed.

25 of the 28 OPEN selections we performed for the human *VEGF-A*, human *HoxB13*, human *CFTR*, and tobacco *SuRA* genes yielded zinc-finger arrays whose sequences closely resembled one another. However, one of these 25 selections (for half-site VF3540R) yielded fingers with sequences that appeared to bind to an alternative site (discussed below). For 22 of the other 24 selections, we obtained at least one zinc-finger array which activated *lacZ* expression by more than three-fold in the quantitative B2H assay. The two remaining selections were also deemed to be successful because their reporters possessed a high basal level of transcription which can artifactually mask a higher true fold-activation. For one selection (site VF3540R), examination of the recognition helix sequences of the arrays obtained from OPEN selection suggests that

these finger arrays do not bind to the intended nine base pair site but rather to the site that is shifted 3' in register by 1 bp (i.e.--these arrays bind to the site: 5'-GCG GCG GAC-3' instead of 5'-GGC GGC GGA-3'). For example, for finger 1, the Asp and Glu selected at position -1 and the Asn selected at position 3 of the recognition helix would be expected to specify cytosine and adenine, respectively, and not the adenine and guanine actually present in the subsite. Similarly, for finger 3, the Arg selected at position -1 and the Ser and Asp selected at position 3 of the recognition helix would be expected to specify guanine and cytosine, respectively, and not the cytosine and guanine actually present. Thus, this selection was deemed to be unsuccessful.

**Table S2 ZFN target sites and associated zinc-finger arrays and ZFNs**

All target sites and half-sites shown are written 5' to 3'. Names of zinc-finger arrays are the same as in Table S1.

**Table S3: Primers used in this study**

### **Supplemental References:**

Alwin, S., Gere, M. B., Guhl, E., Effertz, K., Barbas, C. F., 3rd, Segal, D. J., Weitzman, M. D., and Cathomen, T. (2005). Custom zinc-finger nucleases for use in human cells. *Mol Ther* *12*, 610-617.

Bae, K. H., Do Kwon, Y., Shin, H. C., Hwang, M. S., Ryu, E. H., Park, K. S., Yang, H. Y., Lee, D. K., Lee, Y., Park, J., *et al.* (2003). Human zinc fingers as building blocks in the construction of artificial transcription factors. *Nat Biotechnol* *21*, 275-280.

Bryson, V., and Szybalski, W. (1952). Microbial Selection. *Science* *116*, 45-51.

Cathomen, T., Stracker, T. H., Gilbert, L. B., and Weitzman, M. D. (2001). A genetic screen identifies a cellular regulator of adeno-associated virus. *Proc Natl Acad Sci U S A* *98*, 14991-14996.

Joung, J. K., Ramm, E. I., and Pabo, C. O. (2000). A bacterial two-hybrid selection system for studying protein-DNA and protein-protein interactions. *Proc Natl Acad Sci U S A* *97*, 7382-7387.

Liu, Q., Xia, Z., Zhong, X., and Case, C. C. (2002). Validated zinc finger protein designs for all 16 GNN DNA triplet targets. *J Biol Chem* *277*, 3850-3856.

Mandell, J. G., and Barbas, C. F., 3rd (2006). Zinc Finger Tools: custom DNA-binding domains for transcription factors and nucleases. *Nucleic Acids Res* *34*, W516-523.

Miller, J. C., Holmes, M. C., Wang, J., Guschin, D. Y., Lee, Y. L., Rupniewski, I., Beausejour, C. M., Waite, A. J., Wang, N. S., Kim, K. A., *et al.* (2007). An improved zinc-finger nuclease architecture for highly specific genome editing. *Nat Biotechnol* *25*, 778-785.

Porteus, M. H., and Baltimore, D. (2003). Chimeric nucleases stimulate gene targeting in human cells. *Science* 300, 763.

Pruett-Miller, S. M., Connelly, J. P., Maeder, M. L., Joung, J. K., and Porteus, M. H. (2008). Comparison of Zinc Finger Nucleases for Use in Gene Targeting in Mammalian Cells. *Molecular Therapy*, doi: 10.1038/mt.2008.1020.

Sander, J. D., Zaback, P., Joung, J. K., Voytas, D. F., and Dobbs, D. (2007). Zinc Finger Targeter (ZiFiT): an engineered zinc finger/target site design tool. *Nucleic Acids Res* 35, W599-605.

Southern, E. M. (1975). Detection of specific sequences among DNA fragments separated by gel electrophoresis. *J Mol Biol* 98, 503-517.

Thibodeau, S. A., Fang, R., and Joung, J. K. (2004). High-throughput beta-galactosidase assay for bacterial cell-based reporter systems. *Biotechniques* 36, 410-415.

Thibodeau-Beganny, S., and Joung, J. K. (2007). Engineering Cys2His2 Zinc Finger Domains Using a Bacterial Cell-Based Two-Hybrid Selection System. *Methods in Molecular Biology* 408, 317-334.

Urnov, F. D., Miller, J. C., Lee, Y. L., Beausejour, C. M., Rock, J. M., Augustus, S., Jamieson, A. C., Porteus, M. H., Gregory, P. D., and Holmes, M. C. (2005). Highly efficient endogenous human gene correction using designed zinc-finger nucleases. *Nature* 435, 646-651.

Wright, D. A., Thibodeau-Beganny, S., Sander, J. D., Winfrey, R. J., Hirsh, A. S., Eichinger, M., Fu, F., Porteus, M. H., Dobbs, D., Voytas, D. F., and Joung, J. K. (2006). Standardized reagents and protocols for engineering zinc finger nucleases by modular assembly. *Nat Protoc* 1, 1637-1652.

Wright, D. A., Townsend, J. A., Winfrey, R. J., Jr., Irwin, P. A., Rajagopal, J., Lonosky, P. M., Hall, B. D., Jondle, M. D., and Voytas, D. F. (2005). High-frequency homologous recombination in plants mediated by zinc-finger nucleases. *Plant J* 44, 693-705.



**Figure S1 ZiFiT 3.0 -- Web-based software for identifying potential sites targetable by OPEN selection**

**A.**

IOWA STATE UNIVERSITY  
Dobbs & Voytas Laboratories  
**ZiFiT Version 3.0**

**ZiFiT: Zinc Finger Targeter (V3.0)**

Sequence:

Left Array  Spacer  Right Array

Position 1      Position 2      Position 3

GGG  GGA  GGT  GGC  
 GAG  GAA  GAT  GAC  
 GTA  GTC  
 GCA  GCT  GCC  
 GGG  GGA  GGT  GGC  
 GAG  GAA  GAT  GAC  
 GTA  GTC  
 GCA  GCT  GCC  
 GGG  GGA  GGT  GGC  
 GAG  GAA  GAT  GAC  
 GTA  GTC  
 GCA  GCT  GCC

IOWA STATE UNIVERSITY  
**Becoming the best.**  
Ames, Iowa 50011, (515) 284-4111. Published by: University Relations, [online@iastate.edu](mailto:online@iastate.edu)  
Copyright © 1995-2005, Iowa State University of Science and Technology. All rights reserved.  
[Non-Discrimination Statement and Information Disclosure](#)

**B.**

IOWA STATE UNIVERSITY  
Dobbs & Voytas Laboratories  
**ZiFiT Version 3.0**

**ZiFiT: Zinc Finger Targeter (V3.0)**

Sequence: 293 gCGCGCCTCGGCCTCGGCGGCGCC 318  
293 cCGCGGGAGCGCGGAGCGCGGg 318

| Finger | POOL | TRIPLET | REFERENCE NUMBER | MODULE SOURCE |
|--------|------|---------|------------------|---------------|
| Left1  | 1    | GGG     | P1-9             | Joung         |
| Left2  | 2    | GCG     | P2-9             | Joung         |
| Left3  | 3    | GAG     | P3-5             | Joung         |

| Finger | POOL | TRIPLET | REFERENCE NUMBER | MODULE SOURCE |
|--------|------|---------|------------------|---------------|
| Right1 | 1    | GGC     | P1-11            | Joung         |
| Right2 | 2    | GGG     | P2-3             | Joung         |
| Right3 | 3    | GGC     | P3-3             | Joung         |

Blast CGCGCCTC...NNNNNGCGGCGCC  
Homo sapiens (human) Build 36

323 cCGCCTCGCGGGACCAGCGGAGg 348  
323 gCGGAGCGGCGCTGGCCTCGCCTc 348

| Finger | POOL | TRIPLET | REFERENCE NUMBER | MODULE SOURCE |
|--------|------|---------|------------------|---------------|
| Left1  | 1    | GCG     | P1-9             | Joung         |
| Left2  | 2    | GAG     | P2-5             | Joung         |
| Left3  | 3    | GGC     | P3-3             | Joung         |

| Finger | POOL | TRIPLET | REFERENCE NUMBER | MODULE SOURCE |
|--------|------|---------|------------------|---------------|
| Right1 | 1    | GAG     | P1-5             | Joung         |

IOWA STATE UNIVERSITY  
**Becoming the best.**  
Ames, Iowa 50011, (515) 284-4111. Published by: University Relations, [online@iastate.edu](mailto:online@iastate.edu)  
Copyright © 1995-2005, Iowa State University of Science and Technology. All rights reserved.  
[Non-Discrimination Statement and Information Disclosure](#)

**Figure S2 Schematic of target sites in the *EGFP*, *VEGF-A*, *HoxB13*, and *CFTR* genes**

**A.**

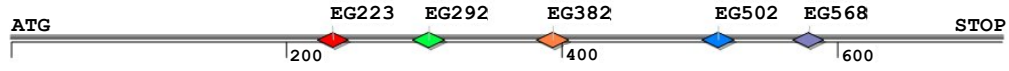

**B.**

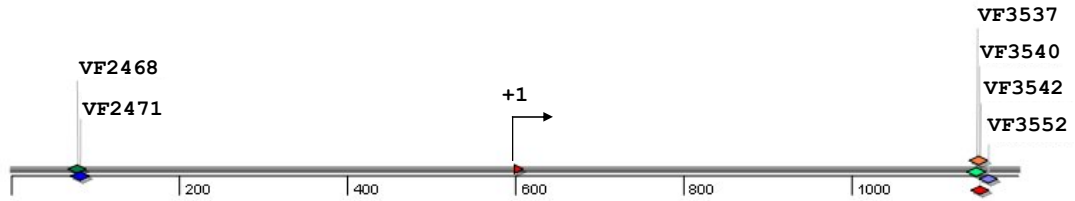

**C.**

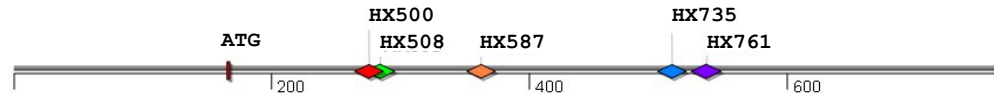

**D.**

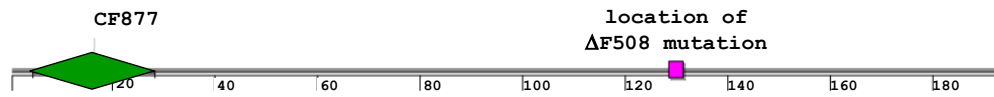

## Figure S3 DNA sequence analysis of endogenous human and plant genes mutagenized by OPEN ZFNs

### A.

|                                    |                                                                                      | % mutants                             |
|------------------------------------|--------------------------------------------------------------------------------------|---------------------------------------|
| <b><u>HX587, Experiment #1</u></b> |                                                                                      |                                       |
| wild-type:                         | TCGGCGGAGCCGCCAAAGCAA <b>TGCCACCCA</b> <b>tgcccTGGGGTGCC</b> CCAGGGGACGTCCCCA (94x)  |                                       |
|                                    | HX587 ZFN site                                                                       |                                       |
| insertions:                        | <br>CTG<br>CCG<br>CCTG<br>CCCG<br>CCTT                                               | (1x)<br>(2x)<br>(14x)<br>(1x)<br>(1x) |
|                                    |                                                                                      | <b>16.8%</b>                          |
| <b><u>HX587, Experiment #2</u></b> |                                                                                      |                                       |
| wild-type:                         | TCGGCGGAGCCGCCAAAGCAA <b>TGCCACCCA</b> <b>tgcccTGGGGTGCC</b> CCAGGGGACGTCCCCA (100x) |                                       |
|                                    | HX587 ZFN site                                                                       |                                       |
| insertion:                         | <br>CCTG                                                                             | (8x)                                  |
|                                    |                                                                                      | <b>7.4%</b>                           |
| <b><u>HX587, Experiment #3</u></b> |                                                                                      |                                       |
| wild-type:                         | TCGGCGGAGCCGCCAAAGCAA <b>TGCCACCCA</b> <b>tgcccTGGGGTGCC</b> CCAGGGGACGTCCCCA (102x) |                                       |
|                                    | HX587 ZFN site                                                                       |                                       |
| insertions:                        | <br>CCTG<br>CCG                                                                      | (2x)<br>(2x)                          |
| deletion:                          | █                                                                                    | (1x)                                  |
|                                    |                                                                                      | <b>4.7%</b>                           |

### B.

|                                    |                                                         | % mutants                            |
|------------------------------------|---------------------------------------------------------|--------------------------------------|
| <b><u>CF877, Experiment #1</u></b> |                                                         |                                      |
| wild-type:                         | CCAGACTT <b>CACTTCTAAtggtgATTATGGGAGAACTGGAG</b> (188x) |                                      |
|                                    | CF877 ZFN site                                          |                                      |
| insertions:                        | <br>CCCA<br>TGACA<br>TGTC<br>TCTCA<br>TGTGA             | (1x)<br>(1x)<br>(1x)<br>(1x)<br>(1x) |
|                                    |                                                         | <b>2.6%</b>                          |
| <b><u>CF877, Experiment #2</u></b> |                                                         |                                      |
| wild-type:                         | CCAGACTT <b>CACTTCTAAtggtgATTATGGGAGAACTGGAG</b> (198x) |                                      |
|                                    | CF877 ZFN site                                          |                                      |
| insertions:                        | <br>TGTC<br>TGTGA                                       | (1x)<br>(1x)                         |
|                                    |                                                         | <b>1.0%</b>                          |
| <b><u>CF877, Experiment #3</u></b> |                                                         |                                      |
| wild-type:                         | CCAGACTT <b>CACTTCTAAtggtgATTATGGGAGAACTGGAG</b> (200x) |                                      |
|                                    | CF877 ZFN site                                          |                                      |
|                                    |                                                         | <b>0%</b>                            |
| <b>no insertions or deletions</b>  |                                                         |                                      |

### C.

|                               |                                                                            | % mutants |
|-------------------------------|----------------------------------------------------------------------------|-----------|
| <b><u>SR2163 ZFN site</u></b> |                                                                            |           |
| wild-type <i>SuRA</i> :       | GCACACACATACCTGGG <b>GAATCCTT</b> Ctaatga <b>GCGGAGAT</b> CCTTCCTAATATGTTG |           |
| wild-type <i>SuRB</i> :       | GCACACACATACCTGGG <b>GAATCCTT</b> Ctaatga <b>GCGGAGAT</b> CCTTCCTAATATGCTG |           |
| deletion in <i>SuRA</i> :     | GCACACACATACCTGGG <b>GAATCCTT</b> █TGAGCGGAGATCCTTCCTAATATGCTG             |           |

**Figure S4 Schematics of donor templates and primers used for gene targeting experiments at the human *VEGF-A* and *IL2R $\gamma$*  genes.**

***VEGF-A*:**

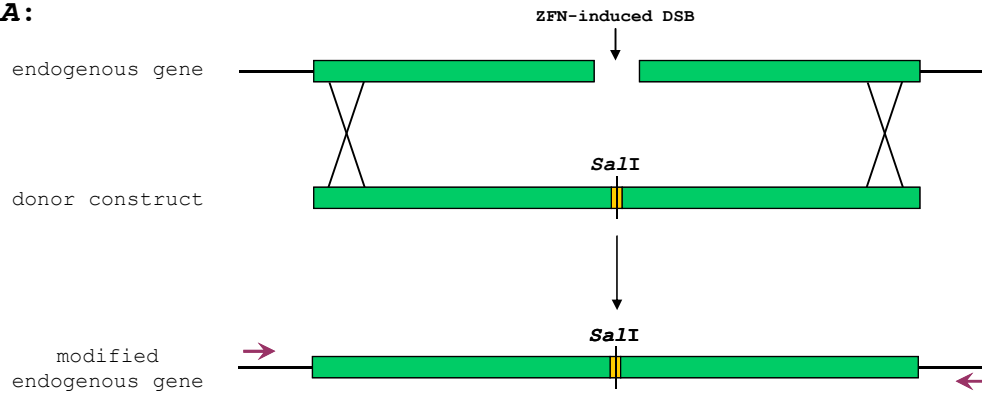

***IL2R $\gamma$* :**

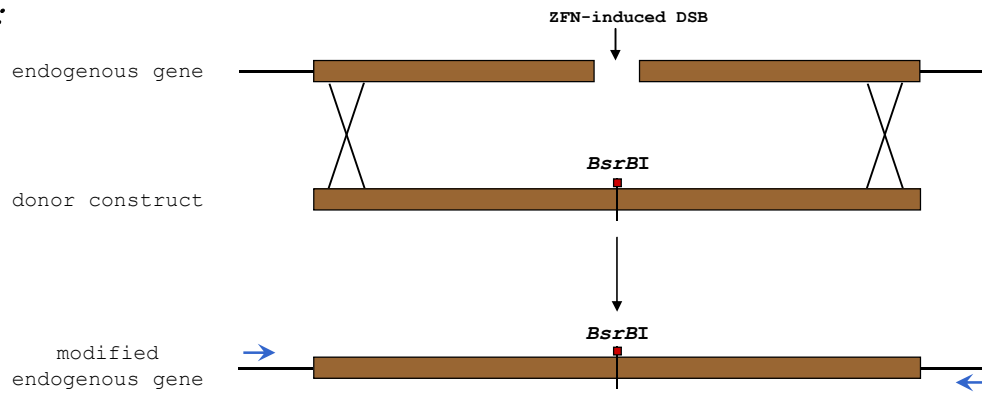

**Figure S5 Comparison of PCR-based and Southern blot methods for assaying gene targeting efficiencies**

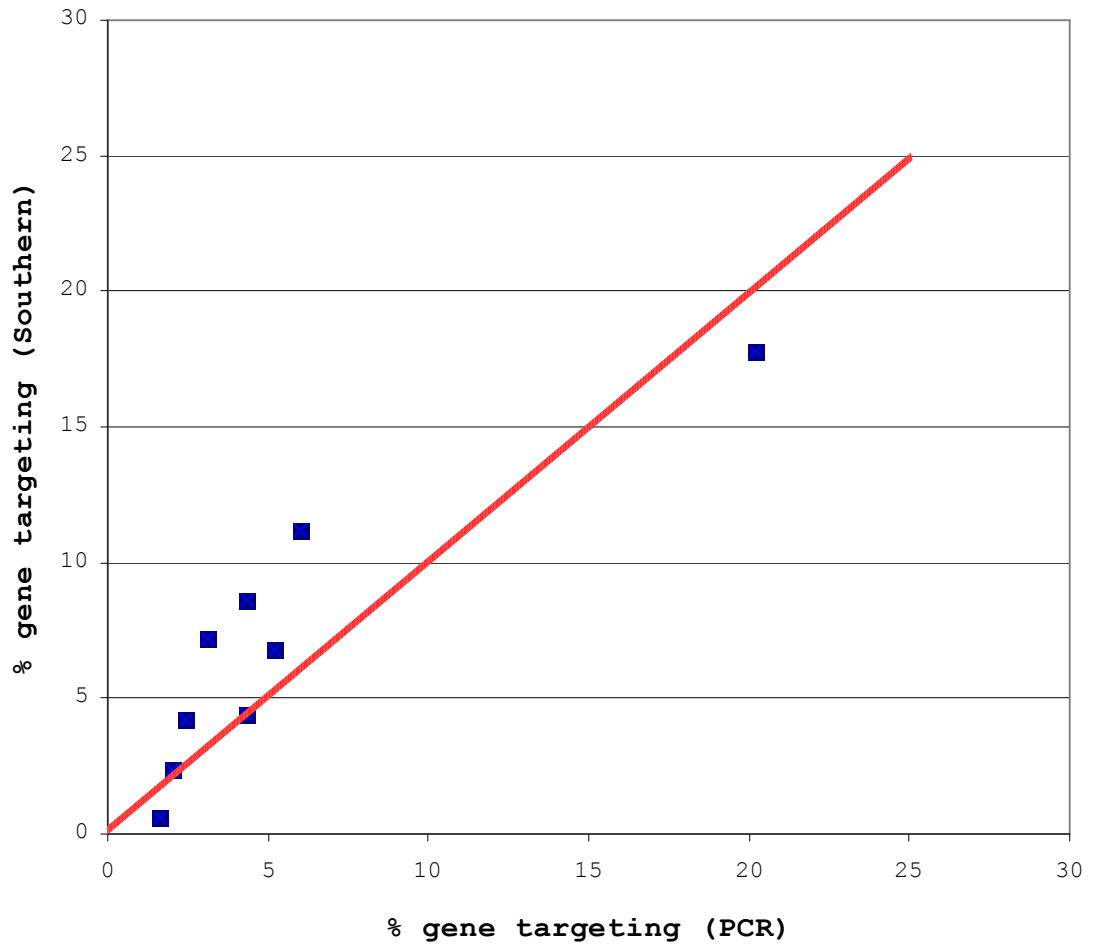

**Figure S6 DNA sequence analysis of endogenous human alleles that have undergone gene targeting induced by ZFNs**

**A.**

| VF2468 ZFN Pair C: |                                                                                   | % of total |
|--------------------|-----------------------------------------------------------------------------------|------------|
|                    | <b>VF2468 ZFN site</b>                                                            |            |
| wild-type:         | AAGCTGGGTGAATGGAGCGAGCAGCGTCTtcgagAGTGAGGACGTGTGTCTGTGTGGGT (18x)                 | 15.9%      |
| GT events:         | TGGGGTCGACC (56x)                                                                 | 49.6%      |
| GT+insertion:      | TGGGGTCGACC GACC (2x)                                                             | 1.8%       |
| insertions:        | GATTC (7x)                                                                        | 16.8%      |
|                    | GATC (3x)                                                                         |            |
|                    | GTTC (5x)                                                                         |            |
|                    | GA (1x)                                                                           |            |
|                    | GT (2x)                                                                           |            |
|                    | GTCGACC (1x)                                                                      |            |
| deletions:         |  | 15.9%      |

**B.**

| VF2471 ZFN Pair B: |                                                                                      | % of total |
|--------------------|--------------------------------------------------------------------------------------|------------|
|                    | <b>VF2471 ZFN site</b>                                                               |            |
| wild-type:         | GCTGGGTGAATGGAGCGAGCAGCGTCTTCgagagtGAGGACGTGTGTGTCTGTGTGGGTGAGT (17x)                | 14.9%      |
| GT events:         | TGGGGTCGACC (54x)                                                                    | 47.4%      |
| insertions:        | AGAG (14x)                                                                           | 21.9%      |
|                    | AG (9x)                                                                              |            |
|                    | AGG (2x)                                                                             |            |
| deletions:         |  | 15.8%      |

### C.

| <i>IL2Ry</i> ZFN pair:                                                                                    |                                                                                                                                                    | % of total                                                               |
|-----------------------------------------------------------------------------------------------------------|----------------------------------------------------------------------------------------------------------------------------------------------------|--------------------------------------------------------------------------|
| wild-type:                                                                                                | <div style="text-align: center;"> <p><i>IL2Ry</i> ZFN site</p> <p>CACGTTTCGTGTT<b>CGGAGCCGCTTTaacc</b>ACTCTGTGGAAGTGCTCAGCATTGGAGTGAATG</p> </div> | (39x) <b>32.0%</b>                                                       |
| GT events:                                                                                                | <div style="text-align: center;"> </div>                                                                                                           | (31x) <b>25.4%</b>                                                       |
| GT+insertion:                                                                                             | <div style="text-align: center;"> </div>                                                                                                           | (11x) <b>9.0%</b>                                                        |
| <p><i>IL2Ry</i> ZFN site</p> <p>CACGTTTCGTGTT<b>CGGAGCCGCTTTaacc</b>ACTCTGTGGAAGTGCTCAGCATTGGAGTGAATG</p> |                                                                                                                                                    |                                                                          |
| insertions:                                                                                               | <div style="text-align: center;"> </div>                                                                                                           | (1x)<br>(26x) <b>24.6%</b><br>(3x)                                       |
| deletions:                                                                                                | <div style="text-align: center;"> <p>---518 bp deletion-----&gt;</p> </div>                                                                        | (1x) <b>9.0%</b><br>(1x)<br>(2x)<br>(2x)<br>(1x)<br>(1x)<br>(2x)<br>(1x) |

Figure S7 (part 1 of 2)

A.

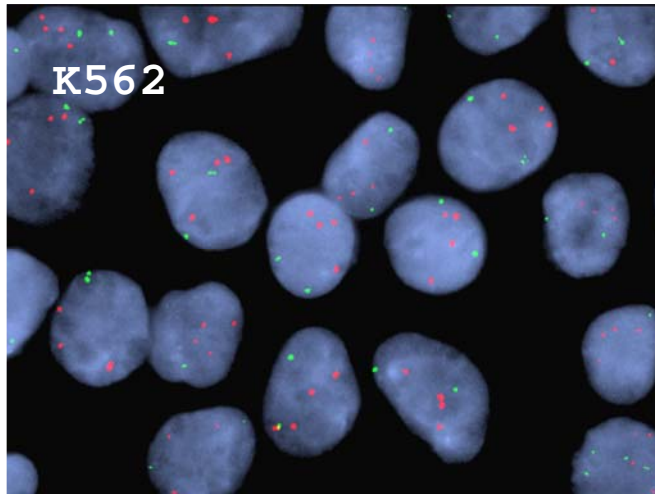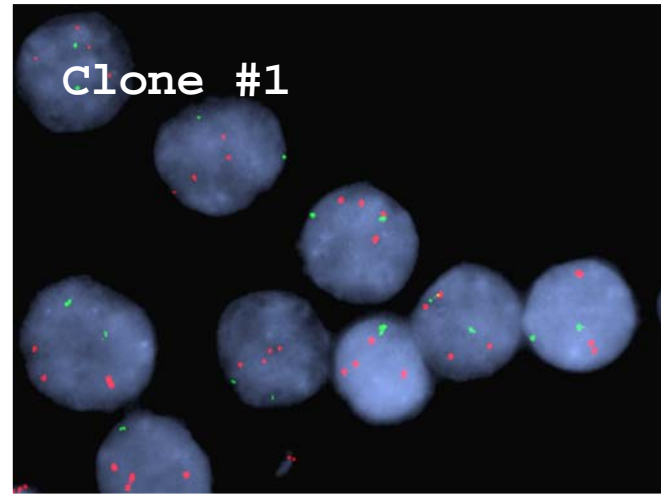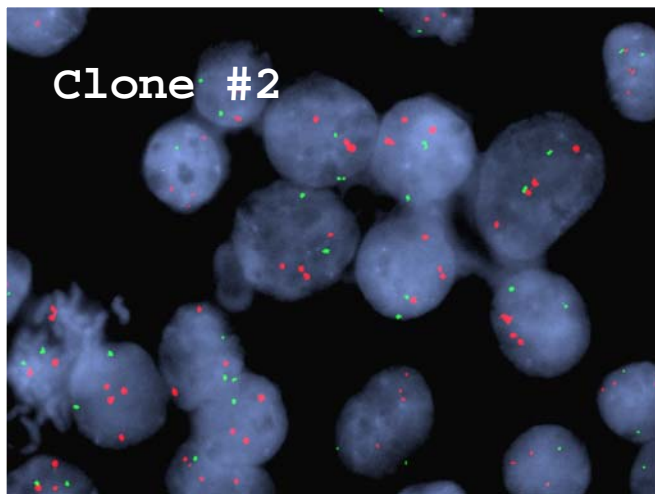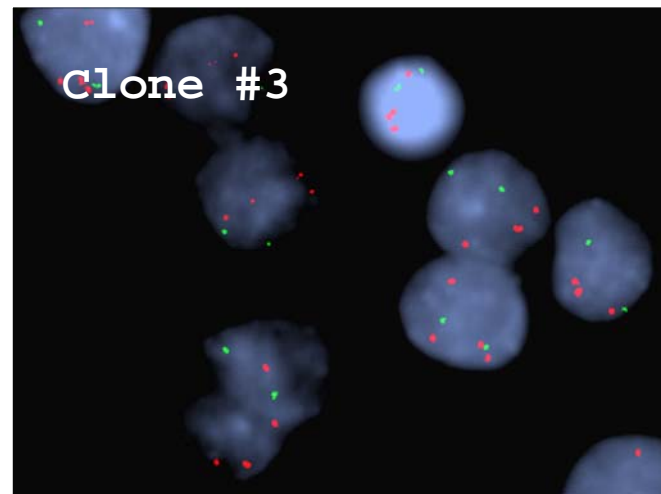



Figure S7 (part 2 of 2)

B.

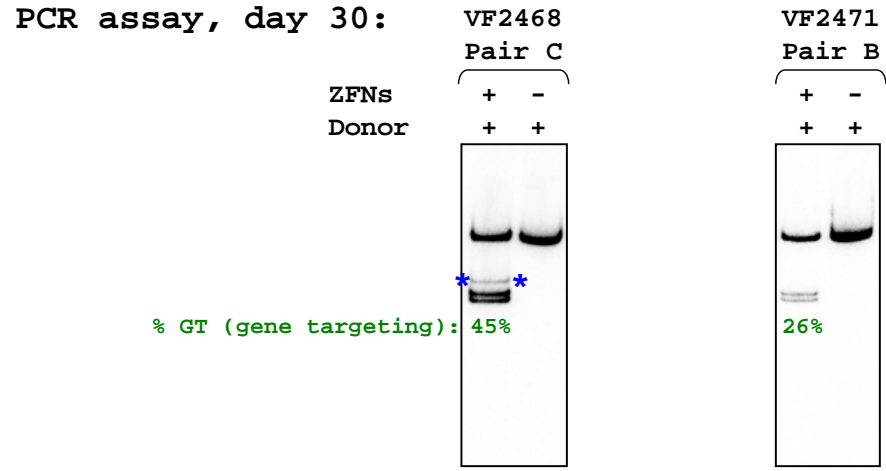

Single cell clone genotyping:

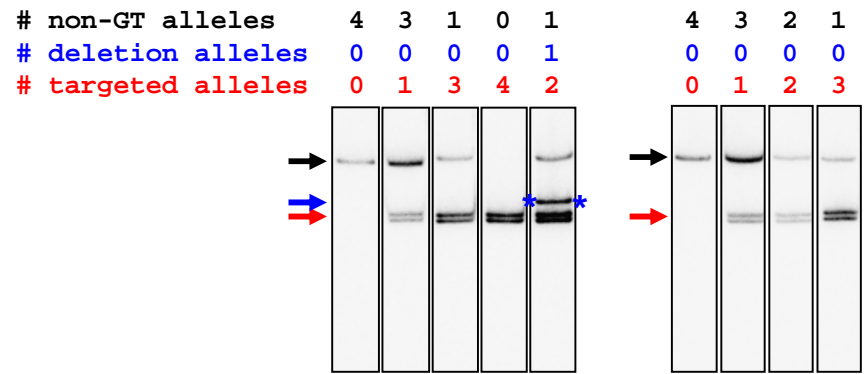

Table S1: Sequences and B2H assays of zinc finger arrays selected by OPEN

| ZFN Name | Site Name | Selection conditions (IPTG/3-AT/Strep) | F1 subsite/RH sequence | F2 subsite/RH sequence | F3 subsite/RH sequence | Mean B2H fold-activation | S.D. of B2H fold-activation | Other mutations (of unknown significance) present? |
|----------|-----------|----------------------------------------|------------------------|------------------------|------------------------|--------------------------|-----------------------------|----------------------------------------------------|
|          |           |                                        | GTA                    | GGG                    | GTC                    |                          |                             |                                                    |
| OZ001    | EG223L    | 50/40/60                               | QDSSLRR                | RQEHLVR                | DPTSLNR                | 4.24                     | 0.17                        |                                                    |
| OZ002    | EG223L    | 50/40/60                               | QQSSLLR                | RQEHLVR                | DPTSLNR                | 3.50                     | 0.13                        |                                                    |
| OZ003    | EG223L    | 50/40/60                               | QPSSLTR                | RKPHLVN                | QPTSLQL                | 0.79                     | 0.03                        |                                                    |
| OZ004    | EG223L    | 50/40/60                               | QQSSLLR                | RGEHLTR                | DQTVLRR                | 3.50                     | 0.33                        |                                                    |
| OZ005    | EG223L    | 50/40/60                               | QQSSLLR                | RGEHLTR                | EPTSLIR                | 3.17                     | 2.10                        |                                                    |
| OZ006    | EG223L    | 50/40/60                               | QPSSLTR                | RREHLVS                | DRRPLPR                | 1.74                     | 0.65                        |                                                    |
| OZ007    | EG223L    | 0/40/60                                | QGSALAR                | RREHLVR                | DPTSLNR                | 4.09                     | 0.08                        |                                                    |
| OZ008    | EG223L    | 0/40/60                                | QSSSLTR                | RGEHLTR                | ESGALRR                | 2.57                     | 1.15                        |                                                    |
| OZ009    | EG223L    | 0/40/60                                | QASALVR                | RREHLVR                | ESGALRR                | 5.23                     | 0.94                        |                                                    |
| OZ010    | EG223L    | 0/40/60                                | QSQUALR                | RVEHLNN                | DRTSLPR                | 0.76                     | 0.09                        |                                                    |
| OZ011    | EG223L    | 0/40/60                                | QQSSLLR                | RREHLVR                | DRTSLAR                | 3.65                     | 0.23                        |                                                    |
| OZ012    | EG223L    | 0/40/60                                | QQSSLLR                | RREHLVR                | DPTSLNR                | 4.29                     | 0.38                        |                                                    |
|          |           |                                        | GCA                    | GCA                    | GAA                    |                          |                             |                                                    |
| OZ013    | EG223R    | 50/60/80                               | SQTQLVR                | QSTTLKR                | QRNNLGR                | 10.81                    | 0.41                        |                                                    |
| OZ014    | EG223R    | 50/60/80                               | RRQELGR                | QGETLKR                | QHPNLTR                | 5.57                     | 0.36                        |                                                    |
| OZ015    | EG223R    | 50/60/80                               | RRQELRR                | QGGTLNR                | QRNNLGR                | 10.36                    | 1.40                        |                                                    |
| OZ016    | EG223R    | 50/60/80                               | RTQELRR                | QSGTLKR                | QGNLGR                 | 8.43                     | 0.98                        |                                                    |
| OZ017    | EG223R    | 50/60/80                               | NNAQLTR                | QSGTLHR                | QRPNLGR                | 6.53                     | 0.55                        |                                                    |
| OZ018    | EG223R    | 50/60/80                               | RRQELGR                | QGGTLKR                | QHPNLTR                | 9.05                     | 0.42                        |                                                    |
| OZ019    | EG223R    | 0/60/80                                | RRQELGR                | QSGTLKR                | QRNNLGR                | 9.74                     | 0.73                        |                                                    |
| OZ020    | EG223R    | 0/60/80                                | RGVELKR                | QSGTLHR                | QRPNLTR                | 11.48                    | 1.63                        |                                                    |
| OZ021    | EG223R    | 0/60/80                                | RPQELAR                | QSGTLKR                | QHPNLTR                | 8.39                     | 0.46                        |                                                    |
| OZ022    | EG223R    | 0/60/80                                | RRQELVR                | QSGTLKR                | QHPNLTR                | 9.38                     | 0.62                        |                                                    |
| OZ023    | EG223R    | 0/60/80                                | HKGQLNR                | QSGTLKR                | QRNNLGR                | 8.74                     | 0.41                        |                                                    |
| OZ024    | EG223R    | 0/60/80                                | RQQLDR                 | QSGTLHR                | QHPNLTR                | 11.92                    | 0.98                        |                                                    |
|          |           |                                        | GGT                    | GAT                    | GAA                    |                          |                             |                                                    |
| OZ025    | EG292L    | 50/40/60                               | TSTRMLI                | LLHNLTR                | QRNNLGR                | 4.40                     | 0.13                        |                                                    |
| OZ026    | EG292L    | 50/40/60                               | DKTKLMV                | VRHNLTR                | QDGNLGR                | 3.33                     | 0.09                        |                                                    |
| OZ027    | EG292L    | 50/40/60                               | TNQKLVV                | VAHNLRR                | QHPNLTR                | 4.89                     | 0.81                        |                                                    |
| OZ028    | EG292L    | 50/40/60                               | DRPTLRR                | QGGNLVR                | QDGNLGR                | 1.10                     | 0.04                        |                                                    |
| OZ029    | EG292L    | 50/40/60                               | TRQRLTV                | VNHNLTR                | LGENLRR                | 3.69                     | 0.59                        |                                                    |
| OZ030    | EG292L    | 50/40/60                               | TNQKLEV                | VRHNLQR                | QHPNLTR                | 5.43                     | 0.40                        |                                                    |
| OZ031    | EG292L    | 0/40/60                                | TTTKLAI                | VRHNLTR                | LGENLRR                | 3.48                     | 1.00                        |                                                    |
| OZ032    | EG292L    | 0/40/60                                | TKQRLEV                | VPHNLKR                | QSVNLRR                | 4.54                     | 0.67                        |                                                    |
| OZ033    | EG292L    | 0/40/60                                | HMSPLRV                | QRETLKR                | DVGNLGR                | 1.05                     | 0.22                        | +                                                  |
| OZ034    | EG292L    | 0/40/60                                | TSQRLAV                | VAHNLRR                | QRNNLDR                | 6.25                     | 1.16                        |                                                    |
| OZ035    | EG292L    | 0/40/60                                | RRLALNR                | LSQTLKR                | AGDNLGR                | 0.80                     | 0.08                        |                                                    |
| OZ036    | EG292L    | 0/40/60                                | TRQRLTV                | VRHNLTR                | QRNNLGR                | 5.39                     | 0.87                        |                                                    |
|          |           |                                        | GGC                    | GAC                    | GAC                    |                          |                             |                                                    |
| OZ037    | EG292R    | 50/60/80                               | APSKLLR                | EQGNLRR                | DGGNLGR                | 5.65                     | 0.65                        |                                                    |
| OZ038    | EG292R    | 50/60/80                               | APSKLDR                | LGENLRR                | DGGNLGR                | 4.74                     | 0.05                        |                                                    |
| OZ039    | EG292R    | 50/60/80                               | APSKLDR                | LGENLRR                | DGGNLGR                | 5.57                     | 1.03                        |                                                    |
| OZ040    | EG292R    | 50/60/80                               | APSKLQR                | EKQNLAR                | DPSNLRR                | 7.59                     | 0.53                        |                                                    |
| OZ041    | EG292R    | 50/60/80                               | APSKLMR                | DKANLTR                | DQGNLIR                | 6.00                     | 0.17                        |                                                    |
| OZ042    | EG292R    | 0/60/80                                | APSKLDR                | LSENLAR                | DPSNLRR                | 1.53                     | 92.11                       |                                                    |
| OZ043    | EG292R    | 0/60/80                                | APSKLDR                | DDANLTR                | DPSNLRR                | 0.81                     | 0.16                        |                                                    |
| OZ044    | EG292R    | 0/60/80                                | APSKLDR                | LGENLAR                | DPSNLRR                | 6.40                     | 1.64                        |                                                    |
| OZ045    | EG292R    | 0/60/80                                | APSKLDR                | LGENLRR                | DPSNLRR                | 1.38                     | 0.17                        |                                                    |
| OZ046    | EG292R    | 0/60/80                                | APSKLDR                | DSSNLRR                | DQGNLIR                | 8.40                     | 2.07                        |                                                    |
|          |           |                                        | GCC                    | GAT                    | GTC                    |                          |                             |                                                    |
| OZ047    | EG382L    | 50/40/60                               | KTTNLKR                | LSQTLKR                | HAHRLSD                | 1.06                     | 0.40                        |                                                    |
| OZ048    | EG382L    | 50/40/60                               | TNRDLGR                | LSENLKR                | DPTSLNR                | 3.39                     | 0.15                        |                                                    |
| OZ049    | EG382L    | 50/40/60                               | VRKDLVR                | LLHNLTR                | DRTPLNR                | 6.02                     | 0.37                        |                                                    |
| OZ050    | EG382L    | 50/40/60                               | HRRDLDR                | VAHNLTR                | DSSPLTR                | 5.50                     | 0.28                        |                                                    |
| OZ051    | EG382L    | 50/40/60                               | HQRDLMR                | VRHNLTR                | DPTSLNR                | 7.93                     | 0.07                        |                                                    |
| OZ052    | EG382L    | 0/40/60                                | DSPTLRR                | VRHNLTR                | DRTSLAR                | 16.44                    | 1.39                        |                                                    |
| OZ053    | EG382L    | 0/40/60                                | DSPTLRR                | VRHNLTR                | DRTSLAR                | 13.84                    | 1.53                        |                                                    |
| OZ054    | EG382L    | 0/40/60                                | MRRDLDR                | VAHNLRR                | DPTSLNR                | 6.90                     | 0.57                        |                                                    |
| OZ055    | EG382L    | 0/40/60                                | VRKDLDR                | IKENLMR                | DRSSLRR                | 21.18                    | 2.30                        |                                                    |
|          |           |                                        | GGC                    | GAC                    | GAG                    |                          |                             |                                                    |
| OZ056    | EG382R    | 1-step gradient                        | APSKLDR                | DVSNLAR                | RRDGLRR                | 10.15                    | 0.24                        |                                                    |
| OZ057    | EG382R    | 1-step gradient                        | APSKLDR                | DRGNLTR                | RQDLLIR                | 5.83                     | 0.28                        |                                                    |

|              |        |                 |         |         |          |       |      |   |
|--------------|--------|-----------------|---------|---------|----------|-------|------|---|
| OZ058        | EG382R | 1-step gradient | APSKLDR | DSSNLRR | VHWNLMR  | 9.06  | 0.25 |   |
| <b>OZ059</b> | EG382R | 1-step gradient | APSKLDR | LVENLRR | RVENLHR  | 5.84  | 1.27 |   |
| <b>OZ060</b> | EG382R | 1-step gradient | APSKLDR | DGSNLRR | REDNLGR  | 5.66  | 0.36 |   |
| OZ061        | EG382R | 1-step gradient | APSKLDR | DASNLAR | VHWNLMR  | 9.21  | 0.47 |   |
| OZ062        | EG382R | 1-step gradient | APSKLDR | DRGNLQR | RQDLLLR  | 6.39  | 1.12 |   |
| OZ063        | EG382R | 1-step gradient | APSKLDR | DKANLTR | RHDQLTR  | 5.89  | 0.33 |   |
| OZ064        | EG382R | 1-step gradient | VPSKLLR | MRENLAR | RIDNLGR  | 5.20  | 0.67 |   |
| OZ065        | EG382R | 1-step gradient | APSKLDR | DNANLKR | RRDGLRR  | 5.37  | 1.01 |   |
| OZ066        | EG382R | 1-step gradient | APSKLTV | DGSNLAR | RIDNLGR  | 0.79  | 0.08 |   |
|              |        |                 | GAT     | GCG     | GTG      |       |      |   |
| OZ067        | EG502L | 2-step gradient | TKQHLAV | RMDMLKR | RPDALPR  | 1.62  | 0.02 |   |
| <b>OZ068</b> | EG502L | 2-step gradient | TRQNLDT | RRDTLRR | RPDALPR  | 2.42  | 0.02 |   |
| <b>OZ069</b> | EG502L | 2-step gradient | TKQRLVU | RTDTLAR | RPDALPR  | 2.23  | 0.49 |   |
| OZ070        | EG502L | 2-step gradient | TNQLLAV | RTDTLAR | RPDALPR  | 1.88  | 0.10 |   |
| OZ071        | EG502L | 2-step gradient | TRQNLDT | RRDTLRR | RPDALPR  | 1.75  | 0.79 |   |
| OZ072        | EG502L | 2-step gradient | EGNNLAR | RRDDLQR | RGDVLGK  | 1.33  | 0.10 |   |
| OZ073        | EG502L | 2-step gradient | TKQRLDV | RTDTLAR | RRDRLGL  | 2.23  | 0.14 |   |
| OZ074        | EG502L | 2-step gradient | TKQRLDV | RTDTLAR | RPDALPR  | 2.02  | 0.19 |   |
|              |        |                 | GCC     | GAC     | GAG      |       |      |   |
| OZ075        | EG502R | 2-step gradient | APSKLMR | DRANLTR | RPDNLPR& | 9.47  | 0.53 |   |
| <b>OZ076</b> | EG502R | 2-step gradient | SPSKLIR | DGSNLAR | RVDNLPR  | 10.74 | 0.53 |   |
| OZ077        | EG502R | 2-step gradient | AQSKLAR | DGSNLRR | RQDGLGS  | 7.73  | 1.26 |   |
| OZ078        | EG502R | 2-step gradient | SNSKLAR | DGSNLRR | RTEMLTR  | 5.70  | 1.08 |   |
| OZ079        | EG502R | 2-step gradient | APSKLDR | DESNLRR | RTSNLTR  | 10.28 | 1.61 | + |
| OZ080        | EG502R | 2-step gradient | APSKLDR | DGSNLRR | RPDNLPR  | 8.72  | 0.51 |   |
| OZ081        | EG502R | 2-step gradient | APSKLDR | LQENLAR | VHWNLMR  | 9.20  | 0.69 |   |
| <b>OZ082</b> | EG502R | 2-step gradient | APSKLDR | DESNLRR | RVDNLPR  | 9.98  | 1.62 |   |
|              |        |                 | GCC     | GTC     | GCC      |       |      |   |
| OZ083        | EG568L | 1-step gradient | SNKDLTR | DHSSLKR | DPSNLRR  | 2.97  | 0.41 |   |
| OZ084        | EG568L | 1-step gradient | DSPTLRR | DPSVLKR | EHRGLKR  | 1.31  | 0.30 |   |
| OZ085        | EG568L | 1-step gradient | VRKDLDR | DSAVLTR | EHRGLKR  | 1.11  | 0.12 |   |
| <b>OZ086</b> | EG568L | 1-step gradient | DSPTLRR | DREVLRR | ERRALKR  | 3.99  | 1.47 |   |
| OZ087        | EG568L | 1-step gradient | HQRDLMR | DSAVLTR | EKRRLAG  | 1.17  | 0.28 |   |
| OZ088        | EG568L | 1-step gradient | HNRDLTR | DISVLHR | EKRRLAL  | 1.03  | 0.07 |   |
| OZ089        | EG568L | 1-step gradient | VRKDLAR | DREVLRR | DHSNLSR  | 1.37  | 0.14 |   |
| OZ090        | EG568L | 1-step gradient | TARALVR | DHSVLKR | ERRGLHR  | 1.54  | 0.12 | + |
| OZ091        | EG568L | 1-step gradient | DRRDLGR | DRGGLRR | EHRGLNR  | 1.04  | 0.05 |   |
| <b>OZ092</b> | EG568L | 2-step gradient | DSPTLRR | RTDGLRR | DHSNLSR  | 5.49  | 0.74 |   |
| OZ093        | EG568L | 2-step gradient | DSPTLRR | RTDGLRR | DHSNLSR  | 5.55  | 0.85 |   |
| OZ094        | EG568L | 2-step gradient | DSPTLRR | RTDGLRR | DHSNLSR  | 5.20  | 1.08 |   |
| OZ095        | EG568L | 2-step gradient | DSPTLRR | RTDGLRR | DHSNLSR  | 5.65  | 0.55 |   |
| OZ096        | EG568L | 2-step gradient | DSPTLRR | RTDGLRR | DHSNLSR  | 5.13  | 0.15 |   |
| OZ097        | EG568L | 2-step gradient | DSPTLRR | RTDGLRR | DHSNLSR  | 5.04  | 0.51 |   |
| OZ098        | EG568L | 2-step gradient | HNTRLAV | DREVLRR | ERRGLAR  | 0.78  | 0.15 |   |
|              |        |                 | GCC     | GCT     | GCT      |       |      |   |
| <b>OZ099</b> | EG568R | 2-step gradient | TARALVR | LSQTLKR | LKHDLGR  | 10.04 | 2.23 | + |
| OZ100        | EG568R | 2-step gradient | LKKDLLR | LSQTLNR | LRHDLHR  | 6.00  | 0.98 |   |
| OZ101        | EG568R | 2-step gradient | DPSTLRR | LRDSLKR | LGHTLNR  | 7.01  | 1.81 |   |
| <b>OZ102</b> | EG568R | 2-step gradient | DPSTLRR | LRDSLKR | LGHTLNR  | 7.88  | 0.86 |   |
| OZ103        | EG568R | 2-step gradient | DPSTLRR | LRDSLKR | LGHTLNR  | 7.32  | 1.49 |   |
| OZ104        | EG568R | 2-step gradient | DPSTLRR | LRDSLKR | LGHTLNR  | 7.62  | 0.39 |   |
| OZ105        | EG568R | 2-step gradient | HRRDLDR | VAHSLKR | LKHDLRR  | 2.25  | 1.63 |   |
| OZ106        | EG568R | 2-step gradient | HRRDLDR | LRDSLKR | LGHTLNR  | 7.67  | 0.26 |   |
|              |        |                 | GTG     | GAA     | TTA      |       |      |   |
| OZ107        | CF877L | 2-step gradient | RKHILDT | QGGNLVR | QQTGLAA  | 1.92  | 0.58 | + |
| OZ108        | CF877L | 2-step gradient | RKSVLLV | QGGNLVR | QTTGLKS  | 2.31  | 0.51 |   |
| OZ109        | CF877L | 2-step gradient | RTSSLKR | RREHLTR | QPTGLTA  | 2.83  | 0.20 |   |
| OZ110        | CF877L | 2-step gradient | RNFILQR | QGGNLVR | QVNGLKA  | 1.61  | 0.15 | + |
| OZ111        | CF877L | 2-step gradient | RKGVLR  | QGGNLVR | QQTGLNV  | 2.20  | 1.90 | + |
| OZ112        | CF877L | 2-step gradient | RTSSLKR | RREHLTR | QPTGLTA  | 2.52  | 0.55 |   |
| OZ113        | CF877L | 2-step gradient | RKSVLHN | QGGNLVR | QTTGLKS  | 1.61  | 0.20 |   |
| OZ114        | CF877L | 2-step gradient | RNFILQR | QGGNLVR | QQTGLAA  | 2.95  | 0.18 |   |
| OZ115        | CF877L | 2-step gradient | RNFILQR | QGGNLVR | QVNGLKA  | 2.71  | 0.12 |   |
| OZ116        | CF877L | 2-step gradient | RRHVLR  | QGGNLVR | QQTGLNV  | 2.53  | 0.38 |   |
| OZ117        | CF877L | 2-step gradient | RKSVLLV | QGGNLVR | QQTGLAA  | 3.87  | 0.33 |   |
| <b>OZ118</b> | CF877L | 2-step gradient | RNFILQR | QGGNLVR | QQTGLNV  | 3.55  | 0.08 |   |
|              |        |                 | GAG     | TGG     | TTA      |       |      |   |

|       |         |                 |         |         |          |       |      |   |
|-------|---------|-----------------|---------|---------|----------|-------|------|---|
| OZ119 | CF877R  | 2-step gradient | RQSNLSR | RKEHLDI | QMTGLNA  | 2.78  | 0.35 |   |
| OZ120 | CF877R  | 2-step gradient | RQSNLAR | RKEHLVG | QASGLNS  | 2.53  | 0.01 |   |
| OZ121 | CF877R  | 2-step gradient | RQSNLSR | RKEHLSI | QRTGLTA  | 2.91  | 0.19 |   |
| OZ122 | CF877R  | 2-step gradient | TTHNLMR | RADHLKV | QGTGLRA  | 4.72  | 0.59 |   |
| OZ123 | CF877R  | 2-step gradient | TKHNLVR | RREHLNI | QTSGLTA  | 5.03  | 0.63 |   |
| OZ124 | CF877R  | 2-step gradient | TKHNLVR | RREHLNI | QTSGLTA  | 4.41  | 0.20 |   |
| OZ125 | CF877R  | 2-step gradient | TKHNLVR | RQEHLNI | QPTGLKV  | 4.00  | 0.85 |   |
| OZ126 | CF877R  | 2-step gradient | TAHNLMR | RREHLTI | QMTGLNA  | 2.57  | 0.28 |   |
| OZ127 | CF877R  | 2-step gradient | RMSNLDR | RREHLTI | QGTGLRA  | 1.60  | 0.02 |   |
| OZ128 | CF877R  | 2-step gradient | TTHNLMR | RKEHLSI | QMTGLNA  | 2.12  | 0.07 |   |
| OZ129 | CF877R  | 2-step gradient | RQSNLSR | RKEHLDI | QMTGLNA  | 2.55  | 0.07 |   |
| OZ130 | CF877R  | 2-step gradient | RPHNLLR | RADHLKV | QTTGLNA  | 2.47  | 0.22 |   |
| OZ131 | CF877R  | 2-step gradient | KHSNLTR | RREHLTI | QPTGLRA  | 2.08  | 0.12 |   |
| OZ132 | CF877R  | 2-step gradient | RQSNLSR | RSEHLAI | QRVGLHA  | 1.28  | 0.05 |   |
| OZ133 | CF877R  | 2-step gradient | KHSNLTR | RADHLKV | QNTGLHA  | 3.24  | 0.05 |   |
| OZ134 | CF877R  | 2-step gradient | RQSNLSR | RNEHLVL | QKTGLRV  | 3.71  | 0.19 |   |
| OZ135 | CF877R  | 2-step gradient | KHSNLTR | RREHLTI | QMTGLNA  | 2.25  | 0.07 |   |
| OZ136 | CF877R  | 2-step gradient | KHSNLTR | RREHLTI | QMTGLNA  | 2.16  | 0.06 |   |
| OZ137 | CF877R  | 2-step gradient | RHSNLTR | RQEHLNI | QMTGLNA  | 2.26  | 0.04 |   |
| OZ138 | CF877R  | 2-step gradient | KKTNLTR | RREHLTI | QQTGLNV  | 2.52  | 0.41 |   |
| OZ139 | CF877R  | 2-step gradient | KHSNLTR | RKEHLSI | QMTGLNA  | 2.74  | 0.03 |   |
| OZ140 | CF877R  | 2-step gradient | KHSNLTR | RKEHLTI | QRTGLSI  | 2.99  | 0.48 |   |
| OZ141 | CF877R  | 2-step gradient | KHGNLTR | RREHLTI | QQTGLNV  | 2.87  | 0.08 |   |
| OZ142 | CF877R  | 2-step gradient | KHSNLTR | RKEHLDI | QMTGLNA  | 2.73  | 0.16 |   |
|       |         |                 | GCT     | GAC     | GAA      |       |      |   |
| OZ143 | VF2471L | 2-step gradient | QRTDLSR | DKGNLSR | QHPNLTR  | 5.71  | 0.14 |   |
| OZ144 | VF2471L | 2-step gradient | TKQGLQR | LQENLTR | QHPNLTR  | 9.95  | 1.57 |   |
| OZ145 | VF2471L | 2-step gradient | QRQALDR | DNSNLAR | QRNNLGR  | 6.33  | 0.14 |   |
| OZ146 | VF2471L | 2-step gradient | GRQALDR | DKANLTR | QRNNLGR  | 6.85  | 0.97 |   |
| OZ147 | VF2471L | 2-step gradient | QTADLRR | DSGNLTR | QGPNLRSR | 6.59  | 1.69 | + |
| OZ148 | VF2471L | 2-step gradient | QRQALDR | DNSNLAR | QRNNLGR  | 5.04  | 1.01 |   |
| OZ149 | VF2471L | 2-step gradient | TKQGLQR | LQENLTR | QHPNLTR  | 6.78  | 0.36 |   |
| OZ150 | VF2471L | 2-step gradient | GRQALDR | DKANLTR | QRNNLGR  | 5.74  | 1.02 |   |
| OZ151 | VF2471L | 2-step gradient | TKQGLQR | LQENLTR | QGPNLRSR | 6.08  | 1.02 |   |
| OZ152 | VF2471L | 2-step gradient | TKQGLQR | LQENLTR | QRNNLGR  | 5.79  | 1.49 |   |
| OZ153 | VF2471L | 2-step gradient | ARQGLNR | DKANLTR | QGPNLRSR | 6.00  | 0.34 |   |
| OZ154 | VF2471L | 2-step gradient | TKQGLQR | LQENLTR | QHPNLTR  | 8.01  | 0.05 |   |
|       |         |                 | GTG     | GAC     | GAG      |       |      |   |
| OZ155 | VF2471R | 2-step gradient | RHTVLRV | DRANLLR | RGDNLNR  | 8.42  | 0.60 |   |
| OZ156 | VF2471R | 2-step gradient | RPFTLAR | DRANLLR | RADNLGR  | 9.19  | 0.80 |   |
| OZ157 | VF2471R | 2-step gradient | RPFTLAR | DRANLLR | RADNLGR  | 9.36  | 0.57 |   |
| OZ158 | VF2471R | 2-step gradient | RNFILQR | DRSNLTR | RHDQLTR  | 6.84  | 0.46 |   |
| OZ159 | VF2471R | 2-step gradient | RPFTLAR | DRANLLR | RADNLGR  | 9.80  | 1.20 |   |
| OZ160 | VF2471R | 2-step gradient | RSTLLRV | DASNLAR | RGDNLNR  | 9.22  | 3.83 |   |
| OZ161 | VF2471R | 2-step gradient | RPFTLAR | DRANLLR | RADNLGR  | 9.02  | 0.33 |   |
| OZ162 | VF2471R | 2-step gradient | RKTILTT | DRANLLR | RADNLGR  | 11.54 | 0.69 |   |
| OZ163 | VF2471R | 2-step gradient | RNSVLQL | DEGNLSR | RIDNLGR  | 8.88  | 0.76 |   |
| OZ164 | VF2471R | 2-step gradient | RASVLDI | DRGNLTR | REDNLGR  | 6.90  | 0.24 |   |
| OZ165 | VF2471R | 2-step gradient | RNFILQR | DPSNLAR | RRDGLRR  | 5.40  | 0.09 | + |
| OZ166 | VF2471R | 2-step gradient | RNFILQR | DRANLRR | RHDQLTR  | 9.67  | 1.17 |   |
|       |         |                 | GGT     | GGT     | GGA      |       |      |   |
| OZ167 | VF3537L | 2-step gradient | LRHHLEA | HNHHLVR | QNSHLRR  | 5.07  | 0.60 |   |
| OZ168 | VF3537L | 2-step gradient | LRHHLEA | MKHHLTR | QTTHLRR  | 4.56  | 2.10 |   |
| OZ169 | VF3537L | 2-step gradient | LRHHLEA | MSHHLIR | QNSHLRR  | 5.59  | 0.12 |   |
| OZ170 | VF3537L | 2-step gradient | LRHHLEA | MKHHLTR | QTTHLRR  | 4.97  | 0.18 |   |
| OZ171 | VF3537L | 2-step gradient | TKQKLQV | HNHHLVR | QTDHLKR  | 5.77  | 0.44 |   |
| OZ172 | VF3537L | 2-step gradient | MKHHLAR | EAAHLSR | QNSHLRR  | 5.46  | 0.96 |   |
| OZ173 | VF3537L | 2-step gradient | LRHHLEA | LPHHLQR | QNSHLRR  | 5.00  | 0.79 |   |
| OZ174 | VF3537L | 2-step gradient | RKQHLEA | HNHHLVR | QTTHLRR  | 7.21  | 0.53 |   |
| OZ175 | VF3537L | 2-step gradient | LRHHLEA | MKHHLGR | QSQHLKR  | 3.37  | 0.07 |   |
| OZ176 | VF3537L | 2-step gradient | MKHHLEA | LPHHLQR | QGGHLAR  | 5.38  | 0.09 |   |
| OZ177 | VF3537L | 2-step gradient | LRHHLEA | MSHHLIR | QNSHLRR  | 6.39  | 0.32 |   |
| OZ178 | VF3537L | 2-step gradient | LRHHLEA | MSHHLIR | QNSHLRR  | 4.58  | 0.15 | + |
|       |         |                 | GGC     | GGC     | GCC      |       |      |   |
| OZ179 | VF3537R | 2-step gradient | RGDHLDR | LKEHLTR | DPSNLRR  | 14.24 | 3.89 |   |
| OZ180 | VF3537R | 2-step gradient | RGDHLDR | LKEHLTR | DPSNLRR  | 8.29  | 0.66 |   |
| OZ181 | VF3537R | 2-step gradient | RGDHLDR | LKEHLTR | DPSNLRR  | 5.29  | 3.37 |   |
| OZ182 | VF3537R | 2-step gradient | APSKLDR | EASKLKR | DPSNLRR  | 3.28  | 0.03 |   |
| OZ183 | VF3537R | 2-step gradient | RGDHLDR | LKEHLTR | DPSNLRR  | 13.74 | 7.23 |   |

|              |         |                 |           |         |          |       |      |   |
|--------------|---------|-----------------|-----------|---------|----------|-------|------|---|
| OZ184        | VF3537R | 2-step gradient | APSKLKR   | ERSHLKR | DPSNLRR  | 1.03  | 0.11 |   |
| <b>OZ185</b> | VF3537R | 2-step gradient | APSKLKR   | EQSKLVR | DPSNLRR  | 3.99  | 0.18 |   |
| OZ186        | VF3537R | 2-step gradient | RGDHLDLDR | LKEHLTR | DPSNLRR  | 7.03  | 5.32 |   |
| OZ187        | VF3537R | 2-step gradient | VPSKLKR   | ERSKLKR | DPSNLRR  | 12.53 | 0.80 |   |
|              |         |                 | GGT       | GGA     | GGA      |       |      |   |
| OZ188        | VF3540L | 2-step gradient | IPNHLAR   | QSAHLKR | QNSHLRR  | 13.95 | 0.37 |   |
| OZ189        | VF3540L | 2-step gradient | IPNHLAR   | QSAHLKR | QNSHLRR  | 15.08 | 1.41 |   |
| OZ190        | VF3540L | 2-step gradient | IPNHLAR   | QSAHLKR | QNSHLRR  | 14.09 | 0.76 |   |
| OZ191        | VF3540L | 2-step gradient | LRHHLEA   | QSPHLKR | QGGHLKR  | 4.09  | 2.71 |   |
| OZ192        | VF3540L | 2-step gradient | KHSNLTR   | RNENLAR | RIDKLGPF | 4.45  | 0.32 |   |
| OZ193        | VF3540L | 2-step gradient | IPNHLAR   | QSAHLKR | QQAHLAR  | 12.73 | 1.36 |   |
| OZ194        | VF3540L | 2-step gradient | IPNHLAR   | QSAHLKR | QMSHLKR  | 15.85 | 5.11 | + |
| OZ195        | VF3540L | 2-step gradient | IPNHLAR   | QSAHLKR | QNSHLRR  | 14.00 | 1.17 |   |
| OZ196        | VF3540L | 2-step gradient | IPNHLAR   | QSAHLKR | QAGHLTR  | 13.06 | 1.05 |   |
| OZ197        | VF3540L | 2-step gradient | IPNHLAR   | QSAHLKR | QQAHLAR  | 10.80 | 0.44 |   |
| OZ198        | VF3540L | 2-step gradient | IPNHLAR   | QSAHLKR | QQAHLAR  | 14.31 | 1.08 |   |
| OZ199        | VF3540L | 2-step gradient | IPNHLAR   | QSAHLKR | QQAHLAR  | 14.58 | 0.60 | + |
|              |         |                 | GGA       | GGC     | GGC      |       |      |   |
| OZ200        | VF3540R | 2-step gradient | EESNLRR   | RPDVLAR | RVDDLGR  | 15.71 | 0.65 |   |
| OZ201        | VF3540R | 2-step gradient | EESNLRR   | RPDVLAR | RVDDLGR  | 16.79 | 1.38 |   |
| OZ202        | VF3540R | 2-step gradient | DEANLRR   | RKDDLKR | REDSLPR  | 8.64  | 0.32 |   |
| OZ203        | VF3540R | 2-step gradient | DEANLRR   | RKDDLKR | REDSLPR  | 7.92  | 1.49 |   |
| OZ204        | VF3540R | 2-step gradient | DEANLRR   | RKDDLKR | REDSLPR  | 7.15  | 0.79 |   |
| OZ205        | VF3540R | 2-step gradient | EESNLRR   | RRESLVR | REDSLPR  | 12.93 | 0.83 |   |
| OZ206        | VF3540R | 2-step gradient | DEANLRR   | RKDDLKR | REDSLPR  | 10.23 | 4.44 |   |
| OZ207        | VF3540R | 2-step gradient | EESNLRR   | RRESLVR | REDSLPR  | 11.05 | 2.29 |   |
| OZ208        | VF3540R | 2-step gradient | DEANLRR   | RKDDLKR | REDSLPR  | 8.34  | 0.09 |   |
| OZ209        | VF3540R | 2-step gradient | DEANLRR   | RKDDLKR | REDSLPR  | 7.95  | 0.09 |   |
|              |         |                 | GCT       | GCT     | GAC      |       |      |   |
| OZ210        | VF2468L | 2-step gradient | LRQTLAR   | VAHSLKR | DPSNLRR  | 5.98  | 1.20 |   |
| <b>OZ211</b> | VF2468L | 2-step gradient | LRQTLAR   | VAHSLKR | DPSNLRR  | 6.68  | 1.26 |   |
| OZ212        | VF2468L | 2-step gradient | LRQTLAR   | VAHSLKR | DPSNLRR  | 5.93  | 0.85 |   |
| OZ213        | VF2468L | 2-step gradient | TKQVLDLDR | VKHSLQR | DPSNLRR  | 4.38  | 0.65 |   |
| OZ214        | VF2468L | 2-step gradient | LRQTLAR   | VAHSLKR | DPSNLRR  | 5.68  | 0.06 |   |
| OZ215        | VF2468L | 2-step gradient | TKQVLDLDR | VKHSLQR | DPSNLRR  | 3.63  | 0.09 |   |
| OZ216        | VF2468L | 2-step gradient | MKNTLTR   | QRSDLTR | DPSNLRR  | 5.47  | 0.21 |   |
| <b>OZ217</b> | VF2468L | 2-step gradient | TGQILDR   | VAHSLKR | DPSNLRR  | 7.19  | 2.15 |   |
| OZ218        | VF2468L | 2-step gradient | LRQTLAR   | VAHSLKR | DPSNLRR  | 6.84  | 0.43 |   |
| OZ219        | VF2468L | 2-step gradient | GRLALLR   | VAHSLKR | DPSNLRR  | 6.34  | 0.69 |   |
|              |         |                 | GGA       | TGA     | GAG      |       |      |   |
| OZ220        | VF2468R | 2-step gradient | RQDRDLDR  | QREHLVT | RRDNLNR  | 9.50  | 0.19 |   |
| OZ221        | VF2468R | 2-step gradient | RQDRDLDR  | QKEHLAG | RRDNLNR  | 9.65  | 1.51 |   |
| OZ222        | VF2468R | 2-step gradient | RQDRDLDR  | QKEHLAV | RGDNLKR  | 10.22 | 1.00 |   |
| OZ223        | VF2468R | 2-step gradient | RQDRDLDR  | QNEHLKV | RADNLRR  | 11.92 | 3.09 |   |
| OZ224        | VF2468R | 2-step gradient | THAHLTR   | QREHLNG | RADNLGR  | 11.96 | 1.07 |   |
| OZ225        | VF2468R | 2-step gradient | THAHLTR   | QREHLTG | RRDNLNR  | 11.54 | 0.52 |   |
| OZ226        | VF2468R | 2-step gradient | RNDRLLR   | QKEHLTV | RRDNLNR  | 11.55 | 0.53 |   |
| <b>OZ227</b> | VF2468R | 2-step gradient | RQDRDLDR  | QKEHLAG | RRDNLNR  | 11.59 | 1.15 |   |
| OZ228        | VF2468R | 2-step gradient | THAHLTR   | QREHLVT | RRDNLNR  | 11.69 | 1.17 |   |
| OZ229        | VF2468R | 2-step gradient | THAHLTR   | QNEHLTG | RGDNLAR  | 10.69 | 0.51 |   |
| <b>OZ230</b> | VF2468R | 2-step gradient | THAHLTR   | QREHLNG | RGDNLKR  | 14.10 | 0.15 |   |
| OZ231        | VF2468R | 2-step gradient | THAHLTR   | QREHLVT | RIDNLGR  | 12.63 | 1.65 |   |
|              |         |                 | GAG       | GAG     | GGG      |       |      |   |
| OZ232        | VF3542L | 2-step gradient | KLTNLTR   | REDNLDR | RIDKLGG  | 4.80  | 0.39 |   |
| <b>OZ233</b> | VF3542L | 2-step gradient | RQMNLDLDR | RQDNLGR | RIDKLGG  | 5.88  | 1.39 |   |
| <b>OZ234</b> | VF3542L | 2-step gradient | KHHNLLR   | RDDNLQR | RMEHLPR  | 5.22  | 0.47 |   |
| OZ235        | VF3542L | 2-step gradient | KPSNLER   | RPDNLVR | RIDKLGG  | 6.10  | 0.22 |   |
| OZ236        | VF3542L | 2-step gradient | KHSNLTR   | RADNLGR | RMEHLPR  | 4.44  | 0.41 |   |
| OZ237        | VF3542L | 2-step gradient | KQSNLLR   | REDNLDR | RRHGLGR  | 4.71  | 0.60 |   |
| OZ238        | VF3542L | 2-step gradient | RMSNLDR   | REDNLGR | RDDGLGR  | 3.13  | 0.12 |   |
| OZ239        | VF3542L | 2-step gradient | RASNLTR   | REDNLDR | RRWGLGR  | 4.38  | 0.40 |   |
| OZ240        | VF3542L | 2-step gradient | KHSNLTR   | RDDNLQR | RNDKLVP  | 5.18  | 0.45 |   |
|              |         |                 | GAC       | GCG     | GCG      |       |      |   |
| OZ241        | VF3542R | 2-step gradient | EEANLRR   | RRDDLTR | REDVLGR  | 8.53  | 1.23 |   |
| OZ242        | VF3542R | 2-step gradient | EEANLRR   | RSDDLRR | RLDMLAR  | 8.72  | 1.11 |   |
| OZ243        | VF3542R | 2-step gradient | EESNLRR   | RRDDLTR | RLDMLAR  | 11.42 | 0.12 |   |
| <b>OZ244</b> | VF3542R | 2-step gradient | EESNLRR   | RRDDLTR | RLDMLAR  | 13.12 | 1.53 |   |

|              |         |                 |         |         |         |       |       |   |
|--------------|---------|-----------------|---------|---------|---------|-------|-------|---|
| OZ245        | VF3542R | 2-step gradient | EEANLRR | RRDDLTR | RLDMLAR | 9.96  | 0.16  |   |
| <b>OZ246</b> | VF3542R | 2-step gradient | EESNLRR | RRDDLTR | RKDLLHR | 10.16 | 0.55  |   |
| OZ247        | VF3542R | 2-step gradient | EQSNLRR | RRDDLTR | RLDMLAR | 8.42  | 1.54  |   |
| OZ248        | VF3542R | 2-step gradient | EESNLRR | RRDDLTR | RLDMLAR | 12.11 | 0.66  |   |
| OZ249        | VF3542R | 2-step gradient | EESNLRR | RRDDLTR | RIDNLGR | 12.25 | 0.70  |   |
| OZ250        | VF3542R | 2-step gradient | EEANLRR | RRDDLTR | RTDLLGR | 8.98  | 0.60  |   |
| OZ251        | VF3542R | 2-step gradient | EEANLRR | RRDDLTR | RLDMLAR | 10.25 | 1.46  |   |
| OZ252        | VF3542R | 2-step gradient | EEANLRR | RKEDLAR | RLDMLAR | 11.82 | 0.37  |   |
|              |         |                 | GCC     | GCC     | GCC     |       |       |   |
| <b>OZ253</b> | VF3552L | 2-step gradient | VPSKLLR | DPSVLTR | EHRGLKR | 4.29  | 0.30  |   |
| <b>OZ254</b> | VF3552L | 2-step gradient | TPSKLLR | DPSVLTR | EHRGLKR | 7.39  | 1.10  |   |
| OZ255        | VF3552L | 2-step gradient | SNSKLLR | DPSVLTR | EHRGLKR | 3.30  | 0.23  |   |
| OZ256        | VF3552L | 2-step gradient | SPSKLVR | DPSVLTR | EGGTLRR | 2.88  | 0.10  | + |
| OZ257        | VF3552L | 2-step gradient | SPSKLVR | DPSVLTR | EHRGLKR | 3.22  | 0.15  |   |
| OZ258        | VF3552L | 2-step gradient | TPSKLLR | DSSVLRR | ERRGLAR | 33.85 | 27.58 |   |
| OZ259        | VF3552L | 2-step gradient | TPSKLLR | DSSVLRR | ERRGLAR | 20.62 | 20.68 |   |
| OZ260        | VF3552L | 2-step gradient | SPSKLVR | DSSVLRR | ERRGLAR | 14.89 | 11.80 |   |
| OZ261        | VF3552L | 2-step gradient | TPSKLLR | DSSVLRR | ERRGLAR | 49.72 | 42.09 |   |
| OZ262        | VF3552L | 2-step gradient | VPSKLLR | DPSVLTR | EHRGLKR | 4.30  | 0.30  |   |
|              |         |                 | GCG     | GAC     | GTG     |       |       |   |
| OZ263        | VF3552R | 2-step gradient | KHDTLHR | DRGNLTR | RGDALAR | 36.42 | 20.49 |   |
| <b>OZ264</b> | VF3552R | 2-step gradient | KNDTLAR | DRANLRR | RPDALSR | 8.12  | 0.82  |   |
| OZ265        | VF3552R | 2-step gradient | KNDTLAR | DRANLRR | RPDALSR | 8.03  | 1.21  |   |
| OZ266        | VF3552R | 2-step gradient | KHDTLHR | DRGNLTR | RGDALAR | 29.45 | 48.83 |   |
| OZ267        | VF3552R | 2-step gradient | KKHTLVK | LRENLAR | RMDALMR | 30.79 | 5.40  |   |
| OZ268        | VF3552R | 2-step gradient | KNDTLAR | DNSNLAR | RGDALAR | 3.93  | 0.17  |   |
| OZ269        | VF3552R | 2-step gradient | KKHTLTK | DRGNLQR | RGDALAR | 9.93  | 2.89  |   |
| OZ270        | VF3552R | 2-step gradient | RNHTLAR | DNSNLAR | RGDALAR | 4.67  | 4.12  |   |
| OZ271        | VF3552R | 2-step gradient | KNDTLAR | ESGNLAR | RGDVLGK | 8.83  | 0.45  |   |
| <b>OZ272</b> | VF3552R | 2-step gradient | RSDTLAR | DQGNLRR | RPDALPR | 10.32 | 1.44  |   |
| OZ273        | VF3552R | 2-step gradient | KRHTLTR | DSGNLTR | RLDVLGN | 3.91  | 0.48  |   |
|              |         |                 | GGG     | GCT     | GCC     |       |       |   |
| OZ274        | HX508L  | 2-step gradient | RSAHLQA | LSQTLKR | ERRGLAR | 2.12  | 0.23  |   |
| OZ275        | HX508L  | 2-step gradient | RSAHLQA | LSQTLKR | EHRGLKR | 3.43  | 0.23  |   |
| <b>OZ276</b> | HX508L  | 2-step gradient | RSAHLQA | LSQTLKR | EHRGLKR | 6.31  | 2.17  | + |
| <b>OZ277</b> | HX508L  | 2-step gradient | RGEHLTN | LSQTLKR | EHRGLKR | 3.61  | 0.72  |   |
| OZ278        | HX508L  | 2-step gradient | RSAHLQA | LSQTLKR | DPSNLRR | 2.75  | 0.15  |   |
| OZ279        | HX508L  | 2-step gradient | RRLHLTN | LSQTLKR | DPSNLRR | 1.89  | 0.04  |   |
| OZ280        | HX508L  | 2-step gradient | RRLHLTN | LSQTLKR | DPSNLRR | 2.34  | 0.13  |   |
|              |         |                 | GCC     | GAT     | GCT     |       |       |   |
| OZ281        | HX508R  | 2-step gradient | AKRDLLR | LMHNLTR | LKHDLRR | 5.74  | 0.65  |   |
| OZ282        | HX508R  | 2-step gradient | HRRDLDR | LMHNLTR | LKHDLRR | 7.92  | 0.93  |   |
| OZ283        | HX508R  | 2-step gradient | AKRDLLR | LLHNLTR | LKHDLRR | 4.79  | 0.37  |   |
| <b>OZ284</b> | HX508R  | 2-step gradient | DGSTLNR | VRHNLTR | VQNSLTR | 8.53  | 1.36  |   |
| <b>OZ285</b> | HX508R  | 2-step gradient | DGSTLNR | IRHNLTR | LKHDLRR | 6.19  | 0.18  |   |
| OZ286        | HX508R  | 2-step gradient | AKRDLLR | LLHNLTR | LKHDLRR | 4.87  | 0.45  |   |
| OZ287        | HX508R  | 2-step gradient | LKKDLLR | IKHNLAR | LKHDLRR | 14.03 | 4.08  |   |
| OZ288        | HX508R  | 2-step gradient | DSSTLAR | VRHNLTR | LKHDLRR | 2.92  | 1.96  |   |
| OZ289        | HX508R  | 2-step gradient | DGSTLRR | VRHNLTR | VSNLARR | 5.88  | 0.19  |   |
| OZ290        | HX508R  | 2-step gradient | AKRDLLR | VNHNLTR | LKHDLRR | 9.20  | 4.01  |   |
| OZ291        | HX508R  | 2-step gradient | DGSTLNR | VRHNLTR | LKHDLRR | 15.46 | 14.60 |   |
|              |         |                 | GGG     | GCT     | GCG     |       |       |   |
| OZ292        | HX761L  | 2-step gradient | KQDHLTK | LSQTLKR | RLDMLAR | 8.12  | 2.53  |   |
| OZ293        | HX761L  | 2-step gradient | KQDHLTK | LSQTLKR | RLDVLAR | 5.32  | 2.71  |   |
| OZ294        | HX761L  | 2-step gradient | KQDHLRV | LSQTLKR | RPDGLAR | 14.19 | 1.10  |   |
| OZ295        | HX761L  | 2-step gradient | KKDHLHR | LSQTLKR | RLDMLAR | 13.99 | 1.72  |   |
| OZ296        | HX761L  | 2-step gradient | KQDHLRV | LSQTLKR | RPDGLAR | 13.85 | 4.18  |   |
| <b>OZ297</b> | HX761L  | 2-step gradient | KQDHLTK | LSQTLKR | RLDMLAR | 10.47 | 2.07  |   |
| OZ298        | HX761L  | 2-step gradient | KQDHLTK | LSQTLKR | RLDMLAR | 11.51 | 0.66  |   |
| OZ299        | HX761L  | 2-step gradient | KQDHLRV | LSQTLKR | RLDMLAR | 9.86  | 0.62  |   |
| <b>OZ300</b> | HX761L  | 2-step gradient | KKDHLHR | LSQTLKR | RLDMLAR | 14.09 | 0.79  |   |
| OZ301        | HX761L  | 2-step gradient | KKDHLHR | LSQTLNR | RLDMLAR | 11.23 | 0.76  |   |
| OZ302        | HX761L  | 2-step gradient | KKDHLHR | LSQTLNR | RLDMLAR | 6.65  | 1.55  |   |
|              |         |                 | GCC     | TTT     | GAG     |       |       |   |
| <b>OZ303</b> | HX761R  | 2-step gradient | AKRDLLR | SPNGLII | VHWNLKR | 4.07  | 0.06  |   |
| <b>OZ304</b> | HX761R  | 2-step gradient | DRRGLVR | SPNGLQV | SASNLTR | 3.31  | 0.58  |   |
| OZ305        | HX761R  | 2-step gradient | AKRDLLR | SPNGLII | VHWNLKR | 4.01  | 0.20  |   |

|       |        |                 |         |         |         |       |      |   |
|-------|--------|-----------------|---------|---------|---------|-------|------|---|
| OZ306 | HX761R | 2-step gradient | AKRDLLR | SPNGLEI | VHWNLMR | 3.32  | 0.02 |   |
| OZ307 | HX761R | 2-step gradient | AKRDLLR | SPNGLII | VHWNLKR | 3.53  | 0.49 |   |
| OZ308 | HX761R | 2-step gradient | LKKDLLR | SQLGLQV | SASNLHR | 2.44  | 0.07 | + |
| OZ309 | HX761R | 2-step gradient | MRRDLLR | SQLGLSV | SASNLTR | 2.67  | 0.05 | + |
| OZ310 | HX761R | 2-step gradient | MRRDLER | SPNGLVI | VHWNLMR | 2.92  | 0.08 |   |
| OZ311 | HX761R | 2-step gradient | MRRDLLR | SQLGLSV | SASNLTR | 2.81  | 0.44 | + |
| OZ312 | HX761R | 2-step gradient | AKRDLLR | SPNGLVI | VHWNLMR | 3.63  | 0.17 |   |
| OZ313 | HX761R | 2-step gradient | MRRDLLR | SQLGLSV | SASNLTR | 2.55  | 0.38 | + |
| OZ314 | HX761R | 2-step gradient | MRRDLLR | SQLGLSV | SASNLTR | 2.94  | 0.14 | + |
|       |        |                 | GGT     | GCT     | GTG     |       |      |   |
| OZ315 | HX500L | 2-step gradient | RQKLDL  | LSQTLKR | RGDALAR | 2.76  | 0.13 |   |
| OZ316 | HX500L | 2-step gradient | TTTKLAI | LSQTLKR | RGDVLGK | 2.88  | 0.55 |   |
| OZ317 | HX500L | 2-step gradient | TTTKLAI | LSQTLKR | RGDVLGK | 3.48  | 0.71 |   |
| OZ318 | HX500L | 2-step gradient | RRSRLDV | LSQTLKR | RGDALAR | 3.15  | 0.06 |   |
| OZ319 | HX500L | 2-step gradient | TTTKLAI | LSQTLKR | RGDVLGK | 4.10  | 0.16 |   |
| OZ320 | HX500L | 2-step gradient | TTTKLAI | LSQTLKR | RGDVLGK | 3.86  | 0.19 | + |
| OZ321 | HX500L | 2-step gradient | TNQKLQV | LSQTLRR | RGDALAR | 3.11  | 0.11 |   |
| OZ322 | HX500L | 2-step gradient | RQKLDL  | LSQTLKR | RGDVLGK | 2.90  | 0.50 |   |
| OZ323 | HX500L | 2-step gradient | TTTKLAI | LSQTLKR | RGDVLGK | 4.09  | 0.22 | + |
| OZ324 | HX500L | 2-step gradient | TTTKLAI | LSQTLNR | RGDVLGK | 4.93  | 0.40 |   |
| OZ325 | HX500L | 2-step gradient | TTTKLAI | LSQTLNR | RGDVLGK | 5.65  | 1.02 |   |
|       |        |                 | TAC     | GCC     | GGC     |       |      |   |
| OZ326 | HX500R | 2-step gradient | DPSNLR  | DSAVLTR | RKEPLGR | 0.96  | 0.06 |   |
| OZ327 | HX500R | 2-step gradient | PLARLEE | DRSVLRN | KRVSLQG | 1.11  | 0.22 |   |
| OZ328 | HX500R | 2-step gradient | VRSPPLD | DVSVLRR | KRVSLGA | 0.96  | 0.04 |   |
| OZ329 | HX500R | 2-step gradient | PLARLEE | DRSVLKR | KRVSLQG | 1.40  | 0.17 |   |
| OZ330 | HX500R | 2-step gradient | SRLGLVA | DHSVLKR | KNISLNH | 1.01  | 0.27 |   |
| OZ331 | HX500R | 2-step gradient | PLARLEE | DHTVLRR | KRVSLQG | 0.93  | 0.04 |   |
| OZ332 | HX500R | 2-step gradient | DRSNLRK | DRTTLKR | DGGHLSR | 1.19  | 0.01 | + |
|       |        |                 | GCA     | GTG     | TGG     |       |      |   |
| OZ333 | HX587L | 2-step gradient | NKTDLGR | RMDVLTR | RSDHLSL | 5.73  | 0.16 | + |
| OZ334 | HX587L | 2-step gradient | NKTDLGR | RMDVLTR | RSDHLSL | 4.87  | 0.54 | + |
| OZ335 | HX587L | 2-step gradient | NKTDLGR | RMDVLTR | RSDHLSL | 5.15  | 0.34 | + |
| OZ336 | HX587L | 2-step gradient | NKTDLGR | RMDVLTR | RSDHLSL | 5.40  | 0.35 | + |
| OZ337 | HX587L | 2-step gradient | NKTDLGR | RMDVLTR | RSDHLSL | 4.94  | 0.29 | + |
| OZ338 | HX587L | 2-step gradient | NKTDLGR | RMDVLTR | RSDHLSL | 5.00  | 0.52 | + |
| OZ339 | HX587L | 2-step gradient | NKTDLGR | RADSLGR | RADHLPQ | 2.51  | 0.33 |   |
| OZ340 | HX587L | 2-step gradient | NKTDLGR | RRDMLRR | RMDHLAG | 14.45 | 2.74 |   |
| OZ341 | HX587L | 2-step gradient | NKTDLGR | RADSLGR | RADHLPQ | 3.10  | 0.16 |   |
| OZ342 | HX587L | 2-step gradient | TPTDLNR | RRDTLRR | RMDHLAG | 5.49  | 0.17 |   |
| OZ343 | HX587L | 2-step gradient | NKTDLGR | RADSLGR | RADHLPQ | 3.34  | 0.22 |   |
| OZ344 | HX587L | 2-step gradient | LKHGLLR | RKDGLMR | RSEHLGI | 3.55  | 0.33 |   |
|       |        |                 | GCC     | GGT     | TGG     |       |      |   |
| OZ345 | HX587R | 2-step gradient | DESTLRR | MKHLGR  | RSDHLSL | 8.15  | 0.73 |   |
| OZ346 | HX587R | 2-step gradient | AKKDLRR | LRQHLVR | RSDHLSL | 2.32  | 0.32 |   |
| OZ347 | HX587R | 2-step gradient | LKKDLLR | LRQSLTR | RSDHLSL | 3.10  | 0.99 |   |
| OZ348 | HX587R | 2-step gradient | VRKDLDR | MKHLGR  | RSDHLSL | 4.05  | 0.12 | + |
| OZ349 | HX587R | 2-step gradient | SKKSLTR | EAAHLSR | RSDHLSL | 7.00  | 0.27 | + |
| OZ350 | HX587R | 2-step gradient | DPSTLRR | LPHHLQR | RMDHLAG | 4.66  | 0.64 |   |
| OZ351 | HX587R | 2-step gradient | LAKDLVR | HKHRLVT | RSDHLSL | 3.74  | 0.29 |   |
| OZ352 | HX587R | 2-step gradient | SKKSLTR | QAHILKR | RSDHLSL | 7.03  | 0.64 |   |
| OZ353 | HX587R | 2-step gradient | HRRDLDR | QRHHLVR | RSDHLSL | 4.60  | 0.16 | + |
| OZ354 | HX587R | 2-step gradient | DPSTLRR | LPHHLKR | RSDHLSL | 7.25  | 0.16 | + |
| OZ355 | HX587R | 2-step gradient | MRRDLLR | LGHHLVR | RSDHLSL | 3.94  | 0.27 |   |
| OZ356 | HX587R | 2-step gradient | DPSTLRR | QTHHLQR | RSDHLSL | 4.48  | 0.33 |   |
|       |        |                 | TCT     | GAG     | TGG     |       |      |   |
| OZ357 | HX735L | 2-step gradient | SKPNLKM | RQDNLGR | RMDHLAG | 3.58  | 0.69 |   |
| OZ358 | HX735L | 2-step gradient | SKPNLKM | RQDNLGR | RSDRLAL | 2.29  | 0.12 | + |
| OZ359 | HX735L | 2-step gradient | SKPNLKM | RADNLGR | RSDRLAL | 2.20  | 0.47 | + |
| OZ360 | HX735L | 2-step gradient | SKPNLKM | RADNLGR | RSDRLAL | 2.32  | 0.21 |   |
| OZ361 | HX735L | 2-step gradient | TKPNLKI | RGDNLVR | RSDHLSL | 2.84  | 0.36 | + |
| OZ362 | HX735L | 2-step gradient | SKPNLKM | RQDNLGR | RRDRLRI | 2.63  | 0.28 |   |
| OZ363 | HX735L | 2-step gradient | SKPNLKM | RGDNLGR | RSDHLSL | 3.01  | 0.12 | + |
| OZ364 | HX735L | 2-step gradient | SNRNLKT | RQDNLGR | RKAGLHI | 2.56  | 0.67 |   |
| OZ365 | HX735L | 2-step gradient | TKPLLKI | RQDNLGR | RSDRLAL | 1.70  | 0.09 |   |
| OZ366 | HX735L | 2-step gradient | SNRNLR  | RADNLGR | RSDRLAL | 1.96  | 0.14 |   |
|       |        |                 | GAG     | GAA     | GGG     |       |      |   |

|              |         |                 |         |         |         |      |      |   |
|--------------|---------|-----------------|---------|---------|---------|------|------|---|
| OZ367        | HX735R  | 2-step gradient | KHSNLTR | QGANLVR | RNDKLV  | 4.85 | 0.88 | + |
| OZ368        | HX735R  | 2-step gradient | KLTNLTR | QKVNLR  | RIDKLG  | 4.72 | 1.15 |   |
| OZ369        | HX735R  | 2-step gradient | KHSNLTR | QHTNLTR | RIDKLG  | 5.51 | 0.94 | + |
| <b>OZ370</b> | HX735R  | 2-step gradient | KKTNLTR | QMSNLDR | RIDKLG  | 6.88 | 1.22 |   |
| <b>OZ371</b> | HX735R  | 2-step gradient | KLTNLTR | QMSNLDR | RGDKLGH | 4.65 | 1.24 |   |
| OZ372        | HX735R  | 2-step gradient | KHSNLTR | QRVNLR  | RIDKLG  | 4.13 | 0.92 |   |
| OZ373        | HX735R  | 2-step gradient | KHSNLTR | QKVNLR  | RGDKLGP | 5.25 | 0.52 |   |
| OZ374        | HX735R  | 2-step gradient | KHSNLTR | QLANLGR | RIDKLG  | 4.66 | 0.53 | + |
| OZ375        | HX735R  | 2-step gradient | KHSNLTR | QKVNLR  | RGDKLGP | 4.53 | 0.96 |   |
| OZ376        | HX735R  | 2-step gradient | RQSNLSR | QMSNLDR | RIDKLG  | 4.90 | 1.80 | + |
| OZ377        | HX735R  | 2-step gradient | KHSNLTR | QQTNLAR | RGDKLGP | 5.59 | 0.65 |   |
|              |         |                 | GCT     | GGC     | TCT     |      |      |   |
| OZ378        | HX2119L | 2-step gradient | HRPSLVR | ERGHLTR | QRNALAG | 1.22 | 0.02 |   |
| OZ379        | HX2119L | 2-step gradient | KHQTLLR | ERGHLSR | QRNALAG | 1.26 | 0.37 |   |
| OZ380        | HX2119L | 2-step gradient | ATGDLRR | ENSGLKR | QNNALTG | 1.01 | 0.30 |   |
| OZ381        | HX2119L | 2-step gradient | AKQGLRR | LKEHLTR | QRNTLQG | 1.41 | 0.06 | + |
| OZ382        | HX2119L | 2-step gradient | RSLTLR  | EQSKLTR | ARNLLRG | 0.77 | 0.05 |   |
| OZ383        | HX2119L | 2-step gradient | TKQVLR  | ENSKLKR | QRNALAG | 1.46 | 0.38 |   |
| OZ384        | HX2119L | 2-step gradient | NKQALDR | LHENLKR | QRNALAG | 2.47 | 0.42 |   |
| OZ385        | HX2119L | 2-step gradient | HKLTLLR | ERGHLSR | QRNTLKG | 2.69 | 1.12 |   |
| OZ386        | HX2119L | 2-step gradient | GMLALRR | LHENLKR | ARNALGG | 0.95 | 0.08 |   |
|              |         |                 | TTC     | GGT     | TCT     |      |      |   |
| OZ387        | HX2119R | 2-step gradient | RPSHLVT | EAHHLGR | ARHLLKG | 1.28 | 0.21 |   |
| OZ388        | HX2119R | 2-step gradient | LHKLLVI | EPHLMR  | QRNALAG | 0.71 | 0.05 |   |
| OZ389        | HX2119R | 2-step gradient | RENHLRI | ERHQLVR | QRNALGG | 0.92 | 0.04 | + |
| OZ390        | HX2119R | 2-step gradient | RHHHLDV | EKHQLIR | QRNTLKG | 1.41 | 0.29 |   |
|              |         |                 | TTC     | GGA     | GAA     |      |      |   |
| <b>OZ391</b> | SR2163L | 2-step gradient | RPNHLAI | QSPHLKR | QSNLNR  | 8.40 | 0.29 |   |
| OZ392        | SR2163L | 2-step gradient | RPNHLTA | QSAHLKR | LGENLRR | 5.74 | 0.34 |   |
| OZ393        | SR2163L | 2-step gradient | RPNHLAI | QSPHLKR | QSNLNR  | 8.10 | 0.05 |   |
| OZ394        | SR2163L | 2-step gradient | RANHLTI | QSAHLKR | LGENLRR | 6.41 | 0.87 |   |
|              |         |                 | GAT     | GGA     | GGC     |      |      |   |
| OZ395        | SR2163R | 2-step gradient | SQQALGV | QSAHLKR | ESGHLKR | 1.70 | 0.23 |   |
| <b>OZ396</b> | SR2163R | 2-step gradient | TKQHLAV | QSAHLKR | ESGHLRR | 1.89 | 0.04 | + |
| OZ397        | SR2163R | 2-step gradient | SKQALAV | QSAHLKR | ENSKLRR | 1.89 | 0.13 | + |
| OZ398        | SR2163R | 2-step gradient | TNQRLDV | QNPHTN  | KNVSLVG | 0.89 | 0.02 |   |
| OZ399        | SR2163R | 2-step gradient | SKQALAV | QSAHLKR | ENSKLRR | 1.74 | 0.07 | + |
| OZ400        | SR2163R | 2-step gradient | TKQHLAV | QSAHLKR | ESGHLRR | 2.08 | 0.25 | + |
| OZ401        | SR2163R | 2-step gradient | SKQALAV | QSAHLKR | ESGHLKR | 1.75 | 0.15 |   |



Table S2

Table S2

| Full ZFN site name | Full ZFN site sequence      | Half-site name | Half-site sequence | # of GXX triplets | Successful B2H selection? | Arrays converted to ZFNs | ZFN Pair A | ZFN Pair B | ZFN Pair C | ZFN Pair D |
|--------------------|-----------------------------|----------------|--------------------|-------------------|---------------------------|--------------------------|------------|------------|------------|------------|
| EG223              | cTACCCCGACcacatGAAGCAGCAC   | EG223L         | gGTCGGGGTAg        | 3                 | YES                       | OZ001                    | X          | X          |            |            |
|                    |                             |                |                    |                   |                           | OZ009                    |            |            | X          | X          |
|                    |                             | EG223R         | tGAAGCAGCAC        | 3                 | YES                       | OZ013                    | X          |            | X          |            |
|                    |                             |                |                    |                   |                           | OZ017                    |            | X          |            | X          |
| EG292              | cACCATCTTcttcaagGACGACGGCa  | EG292L         | aGAAGATGGTg        | 3                 | YES                       | OZ030                    | X          | X          |            |            |
|                    |                             |                |                    |                   |                           | OZ034                    |            |            | X          | X          |
|                    |                             | EG292R         | gGACGACGGCa        | 3                 | YES                       | OZ039                    | X          |            | X          |            |
|                    |                             |                |                    |                   |                           | OZ044                    |            | X          |            | X          |
| EG382              | gGGCATCGACTtcaagGAGGACGGCa  | EG382L         | aGTCGATGCCc        | 3                 | YES                       | OZ051                    | X          | X          |            |            |
|                    |                             |                |                    |                   |                           | OZ052                    |            |            | X          | X          |
|                    |                             | EG382R         | gGAGGACGGCa        | 3                 | YES                       | OZ059                    | X          |            | X          |            |
|                    |                             |                |                    |                   |                           | OZ060                    |            | X          |            | X          |
| EG502              | gATCCGCCACaacatcGAGGACGGCa  | EG502L         | tGTGGCGGATa        | 3                 | YES**                     | OZ068                    | X          | X          |            |            |
|                    |                             |                |                    |                   |                           | OZ069                    |            |            | X          | X          |
|                    |                             | EG502R         | cGAGGACGGCa        | 3                 | YES                       | OZ076                    | X          |            | X          |            |
|                    |                             |                |                    |                   |                           | OZ082                    |            | X          |            | X          |
| EG568              | cGGCGACGGCcccgtGCTGCTGCCc   | EG568L         | gGCCGTCGCCg        | 3                 | YES                       | OZ086                    | X          | X          |            |            |
|                    |                             |                |                    |                   |                           | OZ092                    |            |            | X          | X          |
|                    |                             | EG568R         | tGCTGCTGCCc        | 3                 | YES                       | OZ099                    | X          |            | X          |            |
|                    |                             |                |                    |                   |                           | OZ102                    |            | X          |            | X          |
| CF877              | tCACTTCTAAatggtgaTTATGGGAGa | CF877L         | aTTAGAAGTGa        | 2                 | YES                       | OZ118                    | X          |            |            |            |
|                    |                             | CF877R         | aTTATGGGAGa        | 1                 | YES                       | OZ134                    | X          |            |            |            |
| VF2471             | cAGCGTCTTCgagagtGAGGACGTGt  | VF2471L        | cGAAGACGCTg        | 3                 | YES                       | OZ146                    | X          | X          |            |            |
|                    |                             |                |                    |                   |                           | OZ154                    |            |            | X          | X          |
|                    |                             | VF2471R        | tGAGGACGTGt        | 3                 | YES                       | OZ162                    | X          |            | X          |            |
|                    |                             |                |                    |                   |                           | OZ166***                 |            | X          |            | X          |
| VF3537             | tACCACCTCctccccgGCCGGCGGCg  | VF3537L        | aGGAGGTGGTa        | 3                 | YES                       | OZ172                    | X          | X          |            |            |
|                    |                             |                |                    |                   |                           | OZ177                    |            |            | X          | X          |
|                    |                             | VF3537R        | gGCCGGCGGCg        | 3                 | YES                       | OZ182                    | X          |            | X          |            |
|                    |                             |                |                    |                   |                           | OZ185                    |            | X          |            | X          |
| VF3540             | cACCTCCTCCcgggccGGCGGCGGAc  | VF3540L        | gGGAGGAGGTg        | 3                 | YES                       | ---                      |            |            |            |            |
|                    |                             | VF3540R        | cGGCGGCGGAc        |                   | NO                        | ---                      |            |            |            |            |

**Table S2**

|        |                            |         |              |          |       |       |   |   |   |   |  |
|--------|----------------------------|---------|--------------|----------|-------|-------|---|---|---|---|--|
| VF2468 | gAGCAGCGTCttcgaGAGTGAGGAc  | VF2468L | aGACGCTGCTc  | 3        | YES   | OZ211 | X | X |   |   |  |
|        |                            |         |              |          |       | OZ217 |   |   | X | X |  |
|        |                            | VF2468R | aGAGTGAGGAc  | <b>2</b> | YES   | OZ227 | X |   | X |   |  |
|        |                            |         |              |          |       | OZ230 |   | X |   | X |  |
| VF3542 | cCTCCTCCCCggcccgGCGGCGGACa | VF3542L | cGGGGAGGAGg  | 3        | YES   | OZ233 | X | X |   |   |  |
|        |                            |         |              |          |       | OZ234 |   |   | X | X |  |
|        |                            | VF3542R | gGCGGCGGACa  | 3        | YES   | OZ244 | X |   | X |   |  |
|        |                            |         |              |          |       | OZ246 |   | X |   | X |  |
| VF3552 | gGCCGGCGGCggacaGTGGACGCGg  | VF3552L | cGCCGCCGGCc  | 3        | YES   | OZ253 | X | X |   |   |  |
|        |                            |         |              |          |       | OZ254 |   |   | X | X |  |
|        |                            | VF3552R | aGTGGACGCGg  | 3        | YES   | OZ264 | X |   | X |   |  |
|        |                            |         |              |          |       | OZ272 |   | X |   | X |  |
| HX508  | aCCCAGCGGCgcctacGCTGATGCct | HX508L  | cGCCGCTGGGt  | 3        | YES   | OZ276 | X | X |   |   |  |
|        |                            |         |              |          |       | OZ277 |   |   | X | X |  |
|        |                            | HX508R  | cGCTGATGCct  | 3        | YES   | OZ284 | X |   | X |   |  |
|        |                            |         |              |          |       | OZ285 |   | X |   | X |  |
| HX761  | cCCCAGCCGCcccactGAGTTTGCct | HX761L  | gGCGGCTGGGg  | 3        | YES   | OZ297 | X | X |   |   |  |
|        |                            |         |              |          |       | OZ300 |   |   | X | X |  |
|        |                            | HX761R  | tGAGTTTGCct  | <b>2</b> | YES   | OZ303 | X |   | X |   |  |
|        |                            |         |              |          |       | OZ304 |   | X |   | X |  |
| HX500  | gACCAGCCACccagcGGCGCCTACg  | HX500L  | gGTGGCTGGTc  | 3        | YES   | ---   |   |   |   |   |  |
|        |                            | HX500R  | cGGCGCCTACg  | <b>2</b> | NO    | ---   |   |   |   |   |  |
| HX587  | aTGCCACCCAtgcccTGGGGTGCCc  | HX587L  | aTGGGTGGCAt  | <b>2</b> | YES   | OZ338 | X | X |   |   |  |
|        |                            |         |              |          |       | OZ340 |   |   | X | X |  |
|        |                            | HX587R  | cTGGGGTGCCc  | <b>2</b> | YES   | OZ345 | X |   | X |   |  |
|        |                            |         |              |          |       | OZ349 |   | X |   | X |  |
| HX735  | gAGACTCCCAcggccGGGGAAGAGt  | HX735L  | gTGGGAGTCTc  | <b>1</b> | YES   | OZ357 | X | X |   |   |  |
|        |                            |         |              |          |       | OZ363 |   |   | X | X |  |
|        |                            | HX735R  | cGGGGAAGAGt  | 3        | YES   | OZ370 | X |   | X |   |  |
|        |                            |         |              |          |       | OZ371 |   | X |   | X |  |
| HX2119 | gAGCGCCAGAttaccaTCTGGTTTCa | HX2119L | aTCTGGCGCTc  | <b>2</b> | NO    | ---   |   |   |   |   |  |
|        |                            | HX2119R | aTCTGGTTTCa  | <b>1</b> | NO    | ---   |   |   |   |   |  |
| SR2163 | gGAATCCTTctaataGCGGAGATc   | SR2163L | aGAAGGATTc   | <b>2</b> | YES   | OZ391 | X |   |   |   |  |
|        |                            | SR2163R | aGGCGGAGATc* | 3        | YES** | OZ396 | X |   |   |   |  |

## Table S2

### Notes:

\*This site contained a *dam* methylation site (GATC) and therefore the 3' most C was mutated in the B2H selection strain and B2H reporter strain.

\*\*Although these arrays failed to activate transcription by more than three-fold in the quantitative B2H assay, they were deemed to be successful because their reporters possessed a high basal level of transcription which can often mask a higher true fold-activation.

\*\*\*A PCR-induced mutation was introduced into this array when it was transferred to the human ZFN expression vector (a Thr→Ala mutation at position 8 of its F1 recognition helix).

**Table S3**

| Primer Name      | Sequence                                 |
|------------------|------------------------------------------|
| OK61             | 5'-GGGTAGTACGATGACGGAACCTGTC-3'          |
| OK1424           | 5'-GAGCGCCCTTCCAGTGTCGC-3'               |
| OK1425           | 5'-CGCATAACAGATCCGACACTGAAACGG-3'        |
| OK1426           | 5'-GTGTCGGATCTGTATGCGAAATTTCTCC-3'       |
| OK1427           | 5'-TCGGCATTGGAATGGCTTCTCG-3'             |
| OK1428           | 5'-GCCATTCCAATGCCGAATATGCA-3'            |
| OK1429           | 5'-CCCTCAGGTGGGTTTTTAGGTG-3'             |
| OK1430           | 5'-GGGGAGCGCCCTTCCAGTGTCGC-3'            |
| OK1432           | 5'-GTGCAGAGGATCCCCTCAGGTGGGTTTTTAGGTG-3' |
| OK1681           | 5'-GGCTCTCTGTACATGAAGCAACTCC-3'          |
| OK1682           | 5'-TCACAGCCTGAAAATTACCCATCC-3'           |
| OK1706           | 5'CCCTCTCTCTCTCCTTCTCTTCTT-3'            |
| OK1711           | 5'-GTGCCCCTTCTCTGTCAACCTCTAT-3'          |
| OK1713           | 5'-GCATGCTTTGATGACGCTTCTGTA-3'           |
| OK1718           | 5'GATTGCTCTACTTCCCCAAATCACTG-3'          |
| OK1733           | 5'-GGATGGAGCCAAGGATATCGAAG-3'            |
| OK1734           | 5'-GTAAGTGGCCATAGGCTGGTAGGTT-3'          |
| OK1736           | 5'-TACGCTGATGCCTGCTGTCAACTAT-3'          |
| OK1738           | 5'-ACTGTCCACAGGCAACAGGGAGT-3'            |
| OK1773           | 5'-GAGAGCCGTTCCCTCTTTG-3'                |
| OK1776           | 5'-GGAAGATGTGGAGAGTTGGAGGAAA-3'          |
| OK1777           | 5'-CGACTTCTCTCTGGAGCTCTTGCTA-3'          |
| OK1823           | 5'-AAGTCAAGTTGTTTCAGGGGGCTAAG-3'         |
| OK1824           | 5'-AAGCCACTAACTTTCCCTTGTGC-3'            |
| OK1838           | 5'-AGGGGAGGCATTAGATTCAAGTCAG-3'          |
| OK1845           | 5'GATTCAACCAGACAGATAGAAGG-3'             |
| OK1846           | 5'-TTACTGTCTCATCCTTTACTCC-3'             |
| OS216            | 5'-GAAGGCAAACCTCAGTGGGGCGGC-3'           |
| DVO4429          | 5'-TTTCAGTTTCGTGGCGCTCTCGTC-3'           |
| DVO4444          | 5'-CCATCTCCCTCTTCTCCGC-3'                |
| DVO4445          | 5'-GCGGCGGCTCCATCTCCCTC-3'               |
| DVO4461          | 5'-GATAATACAAGGCCTAGAACTAGCTCTGTAGC-3'   |
| DVO4462          | 5'-GTGATGGCAGTTTCATCATGAATG-3'           |
| DVO4565          | 5'-CCCCTTTTAGCTTAGTAGTGCTCTCATG-3'       |
| T3 (Invitrogen)  | 5'-ATTAACCCTCACTAAAGGGA-3'               |
| M13 (Invitrogen) | 5'-CAGGAAACAGCTATGAC-3'                  |
